# Supplementary material for: Facile access to tetra-substituted FeIIFeII biomimetics for the oxidized state active site of [FeFe]-hydrogenases
Source: Royal Society of Chemistry journal article supplement (doi:10.1039/d4qi00773e), 2024-01-01
Supplement: d4qi00773e1.pdf [file d4qi00773e1.pdf]

## Facile access to tetra-substituted Fe<sup>II</sup>Fe<sup>II</sup> biomimetics for the oxidized state active site of [FeFe]-hydrogenases

Xin-Ping Gao,<sup>a</sup> Shu-Fen Bai,<sup>a</sup> Yan-Lan Wang,<sup>a</sup> Shuang Lü,<sup>\*b</sup> and Qian-Li Li<sup>\*a</sup>

<sup>a</sup> Shandong Provincial Key Laboratory of Chemical Energy Storage and Novel Cell Technology, School of Chemistry and Chemical Engineering, Liaocheng University, Liaocheng 252059, P.R. China

<sup>b</sup> State Key Laboratory for Macromolecule Drugs and Large-scale Manufacturing, School of Pharmaceutical Sciences, Liaocheng 252059, P.R. China

### Contents

|      |               |                                                    |             |
|------|---------------|----------------------------------------------------|-------------|
| I.   | Figs. S1-S36  | IR and NMR spectra.....                            | Pages 2-20  |
| II.  | Figs. S37-S41 | CV and bulk electrolysis curves.....               | Pages 20-22 |
| III. | Tables S1-S2  | Crystal data and structure refinement parameters.. | Pages 23-24 |
| IV.  | Tables S3-S10 | Selected bond lengths (Å) and angles (°).....      | Pages 25-32 |

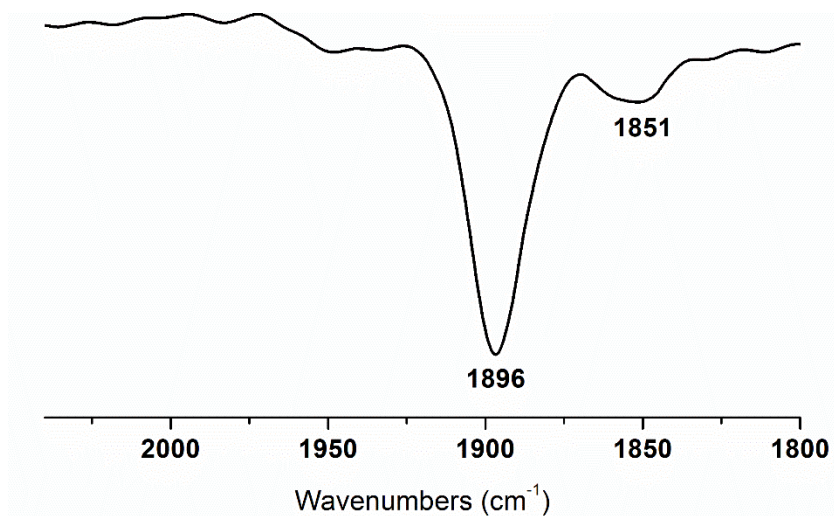

Figure S1. FT-IR ( $\text{CH}_2\text{Cl}_2$ ,  $25^\circ\text{C}$ ) spectrum of **1**. Assignments:  $\nu_{\text{CO}} = 1896, 1851 \text{ cm}^{-1}$ .

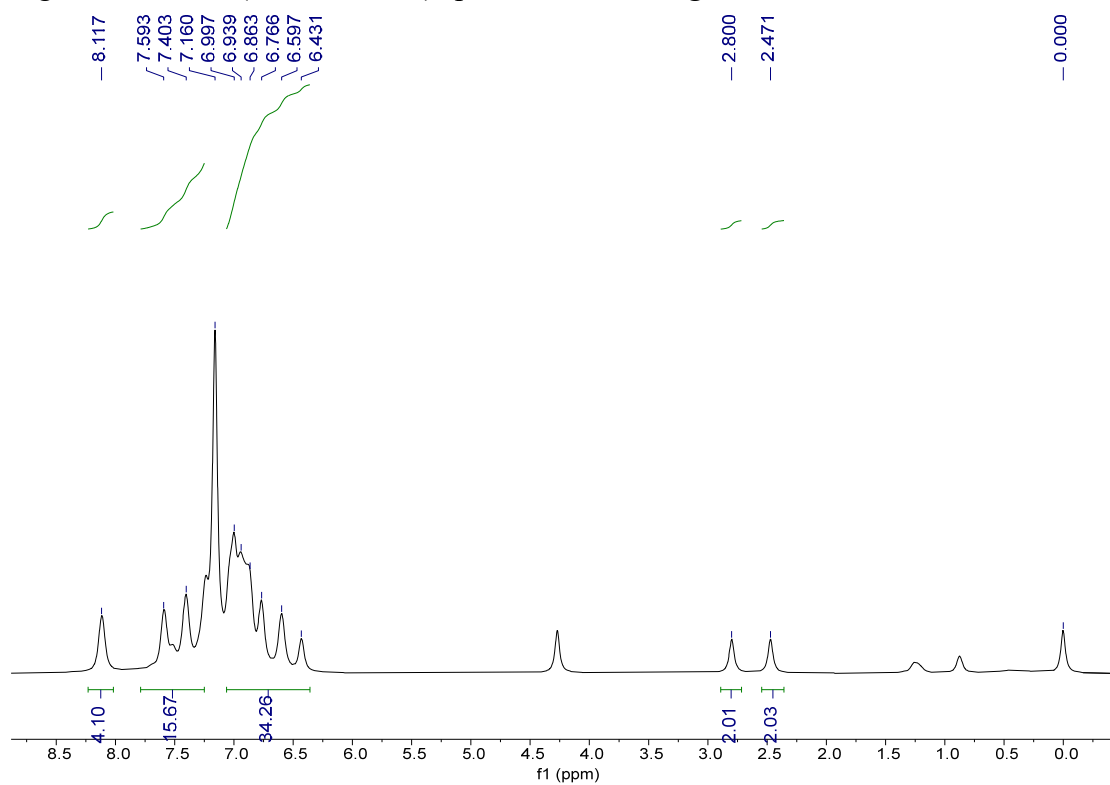

Figure S2.  $^1\text{H}$  NMR (500 MHz,  $\text{C}_6\text{D}_6$ ,  $25^\circ\text{C}$ ) spectrum of **1**. Assignments:  $\delta = 6.43\text{-}8.12$  (m, 54H,  $10\text{C}_6\text{H}_5$  and  $2\text{CH}=\text{CH}$ ), 2.80, 2.47 (s, 4H,  $2\text{CH}_2$ ).

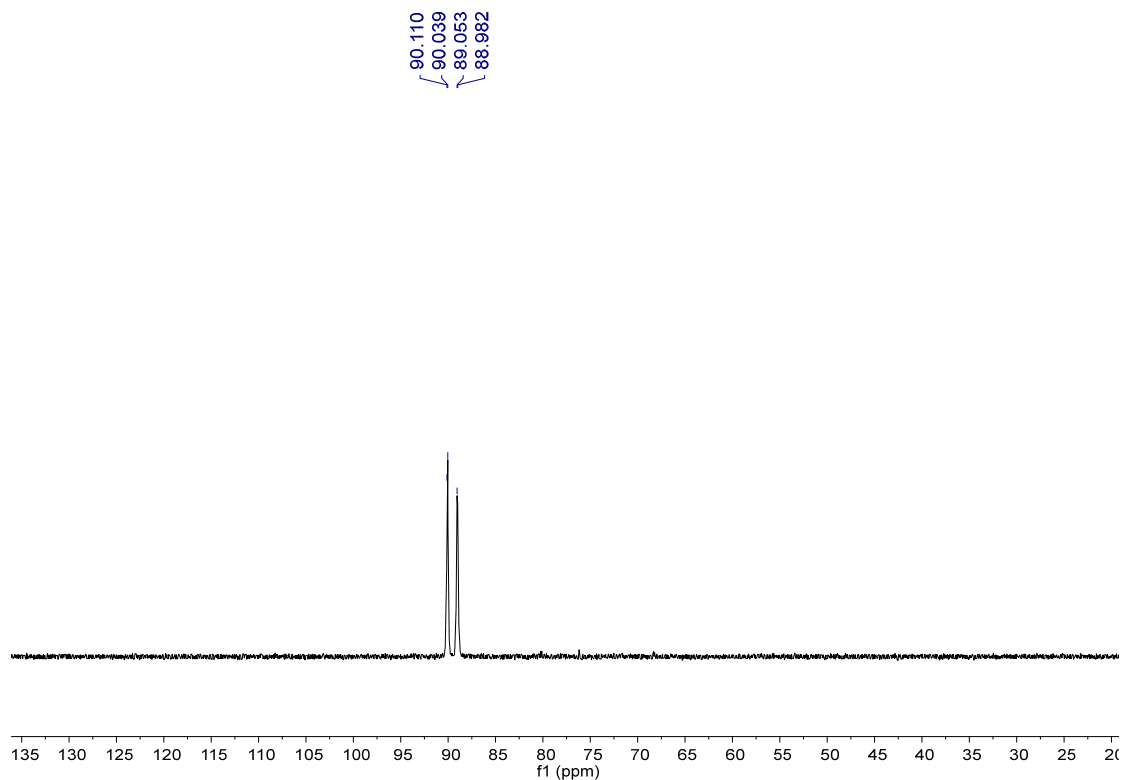

Figure S3.  $^{31}\text{P}$  NMR (202 MHz,  $\text{C}_6\text{D}_6$ , 25 °C) spectrum of **1**. Assignments:  $\delta = 90.1$  (d,  $J_{\text{P-P}} = 11.1$  Hz), 89.0 (d,  $J_{\text{P-P}} = 11.1$  Hz).

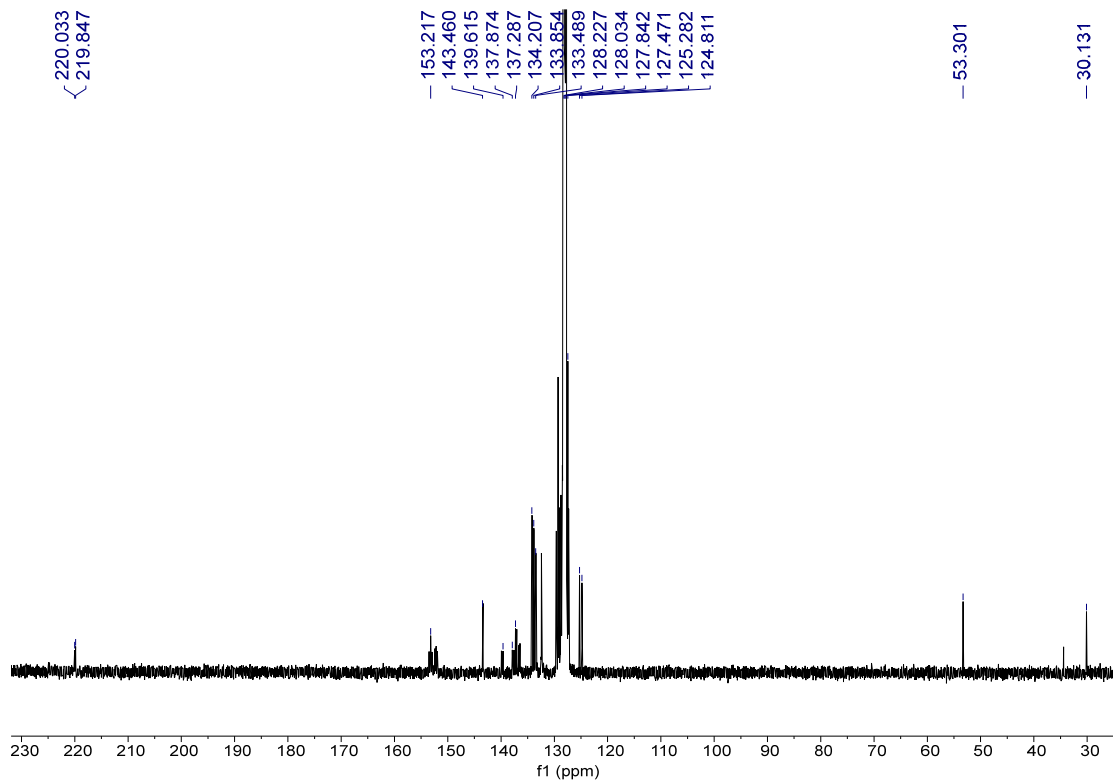

Figure S4.  $^{13}\text{C}$  NMR (126 MHz,  $\text{C}_6\text{D}_6$ , 25 °C) spectrum of **1**. Assignments:  $\delta = 220.1$  (t,  $^2J_{\text{P-C}} = 3.4$  Hz, PFeCO), 219.8 (t,  $^2J_{\text{P-C}} = 3.2$  Hz, PFeCO), 153.2-124.8 (m,  $\text{C}_6\text{H}_5$  and PCH=CHP), 30.1 (s,  $\text{CH}_3$ ).

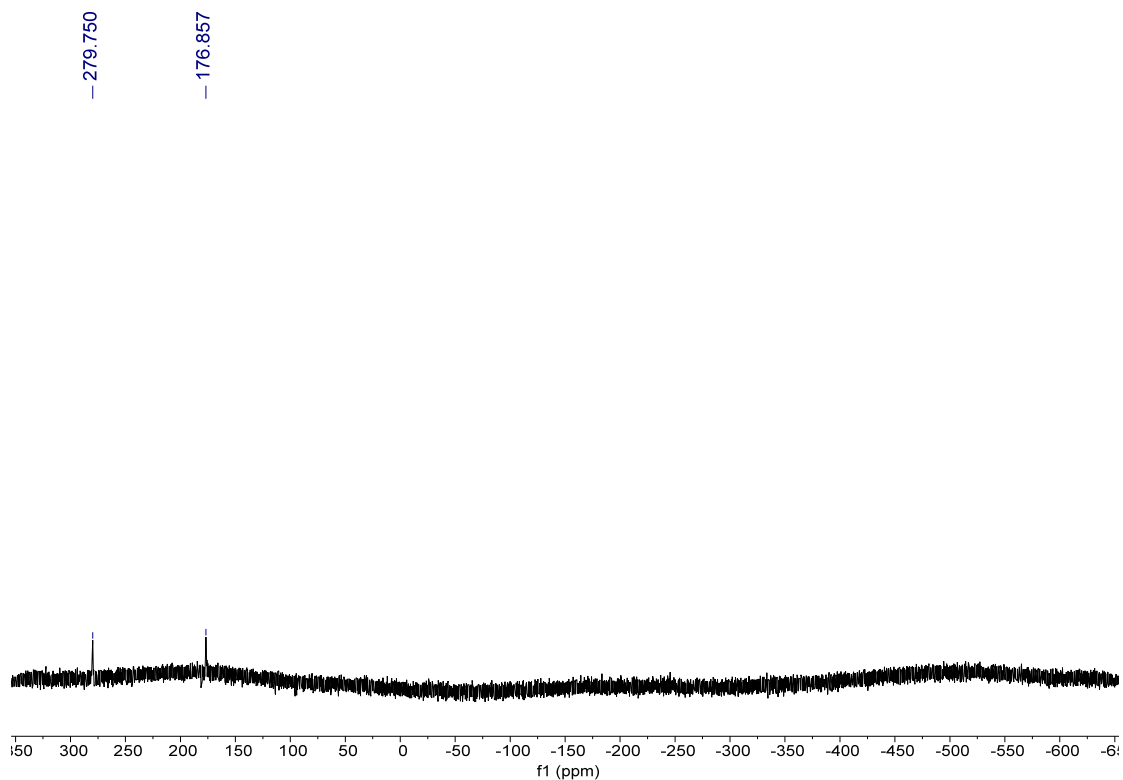

Figure S5.  $^{77}\text{Se}$  NMR (95 MHz,  $\text{C}_6\text{D}_6$ , 25 °C) spectrum of **1**. Assignments:  $\delta = 279.8$  (s), 176.9 (s).

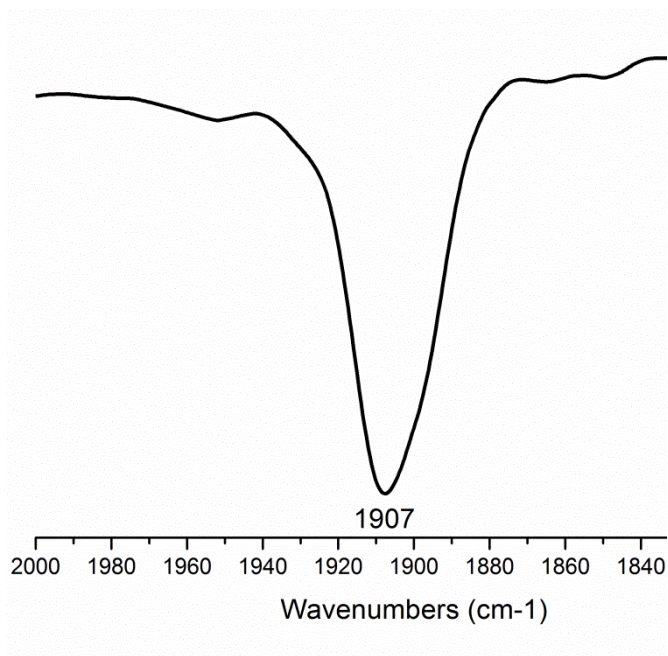

Figure S6. FT-IR ( $\text{C}_6\text{D}_6$ , 25 °C) spectrum of **2**. Assignments:  $\nu_{\text{CO}} = 1907 \text{ cm}^{-1}$ .

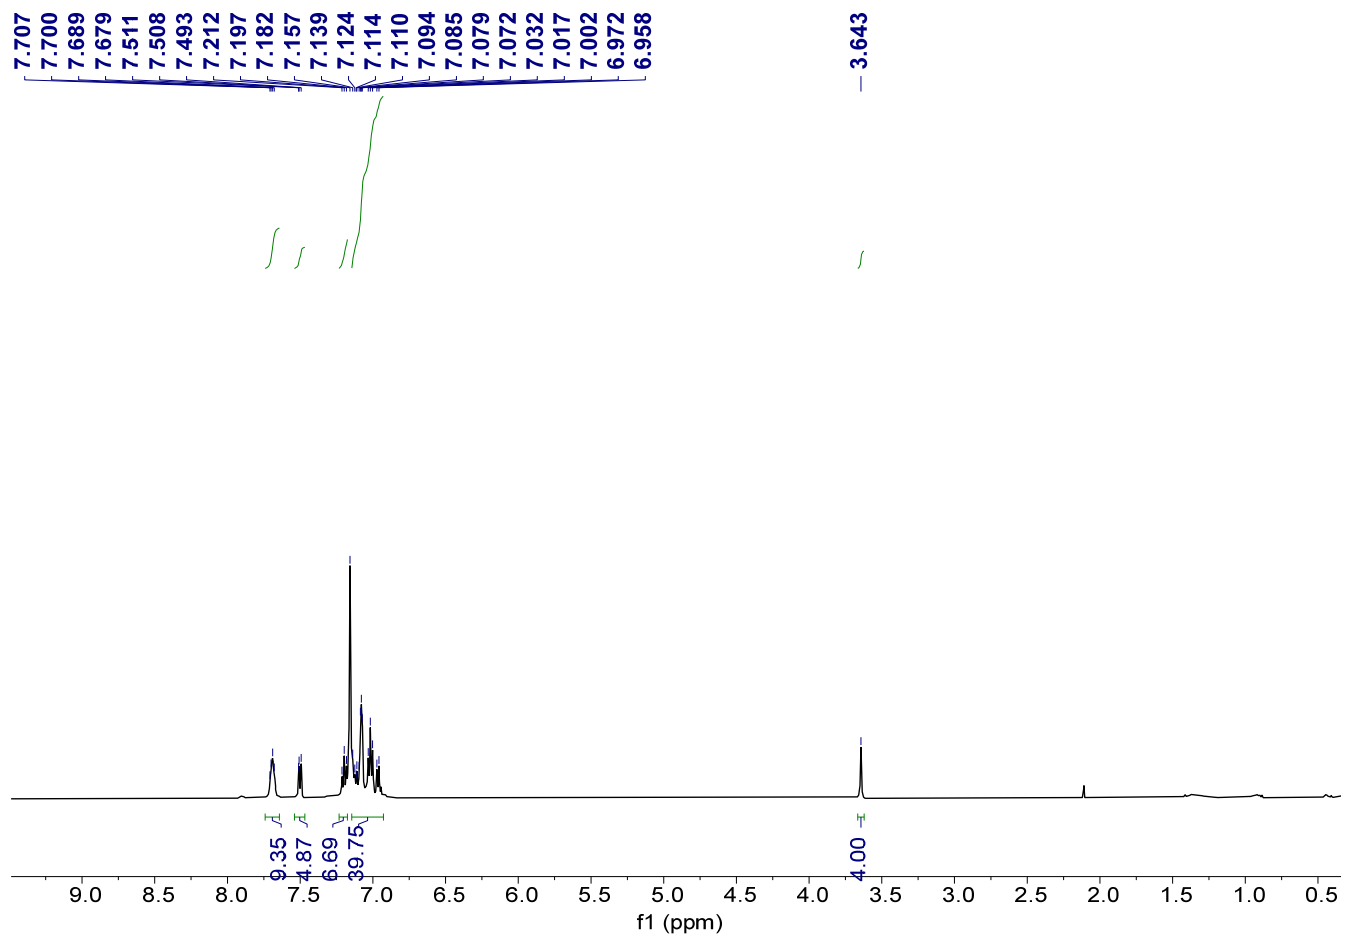

Figure S7.  $^1\text{H}$  NMR (500 MHz,  $\text{C}_6\text{D}_6$ , 25  $^\circ\text{C}$ ) spectrum of **2**. Assignments:  $\delta =$  6.96-7.70 (m, 54H, 10 $\text{C}_6\text{H}_5$  and 2 $\text{CH}=\text{CH}$ ), 3.64 (s, 4H, 2 $\text{CH}_2$ ).

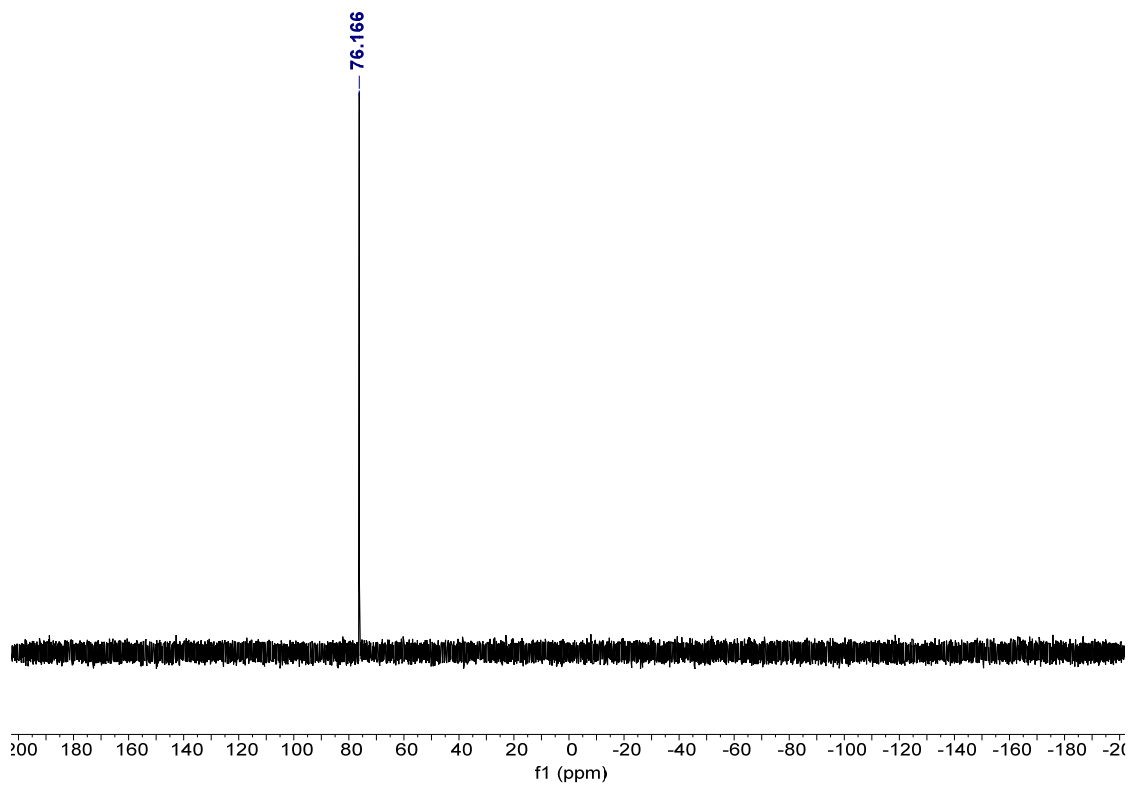

Figure S8.  $^{31}\text{P}$  NMR (202 MHz,  $\text{C}_6\text{D}_6$ , 25  $^\circ\text{C}$ ) spectrum of **2**. Assignments:  $\delta = 76.2(\text{s})$ .

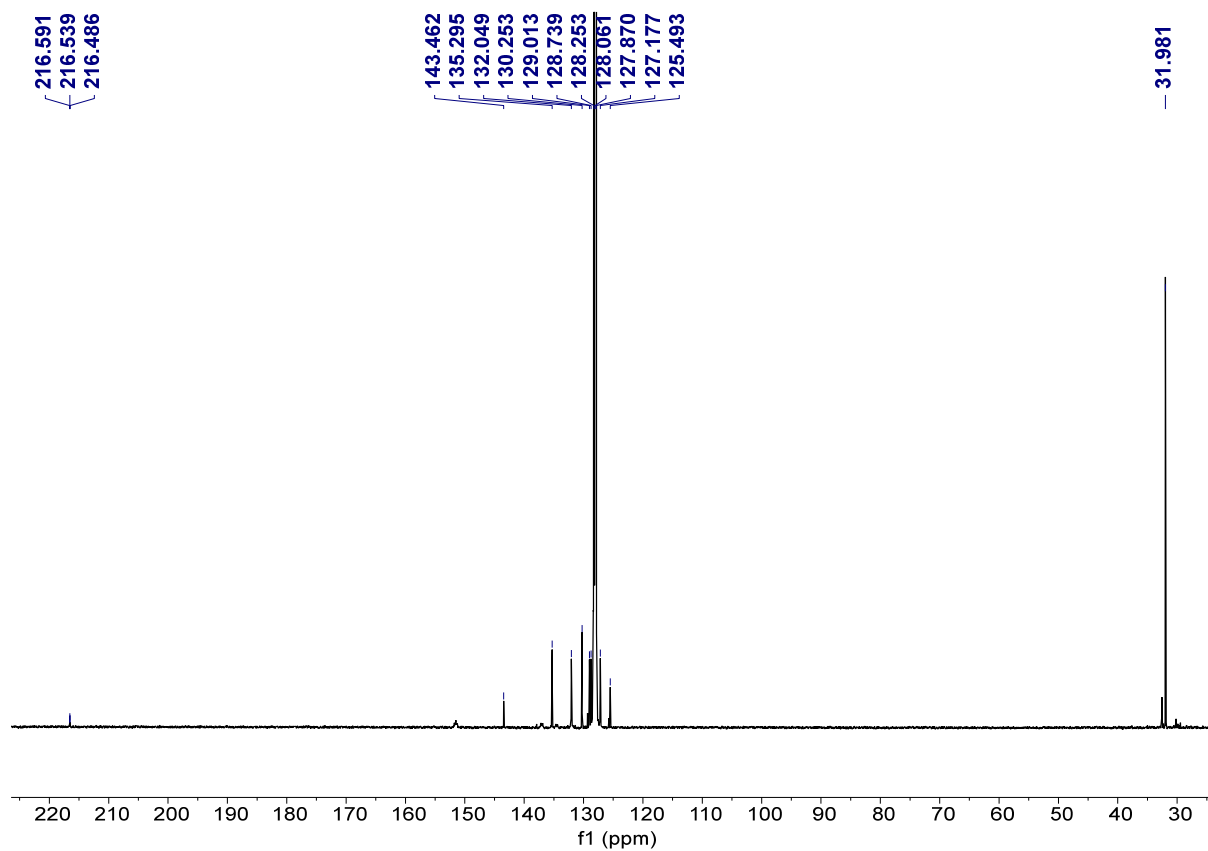

Figure S9.  $^{13}\text{C}$  NMR (126 MHz,  $\text{C}_6\text{D}_6$ , 25  $^\circ\text{C}$ ) spectrum of **2**. Assignments:  $\delta = 216.5$  (t,  $^2J_{\text{P-C}} = 6.5$  Hz,  $\text{PFeCO}$ ), 151.5-125.5 (m,  $\text{C}_6\text{H}_5$  and  $\text{PCH=CHP}$ ), 32.0 (s,  $\text{CH}_3$ ).

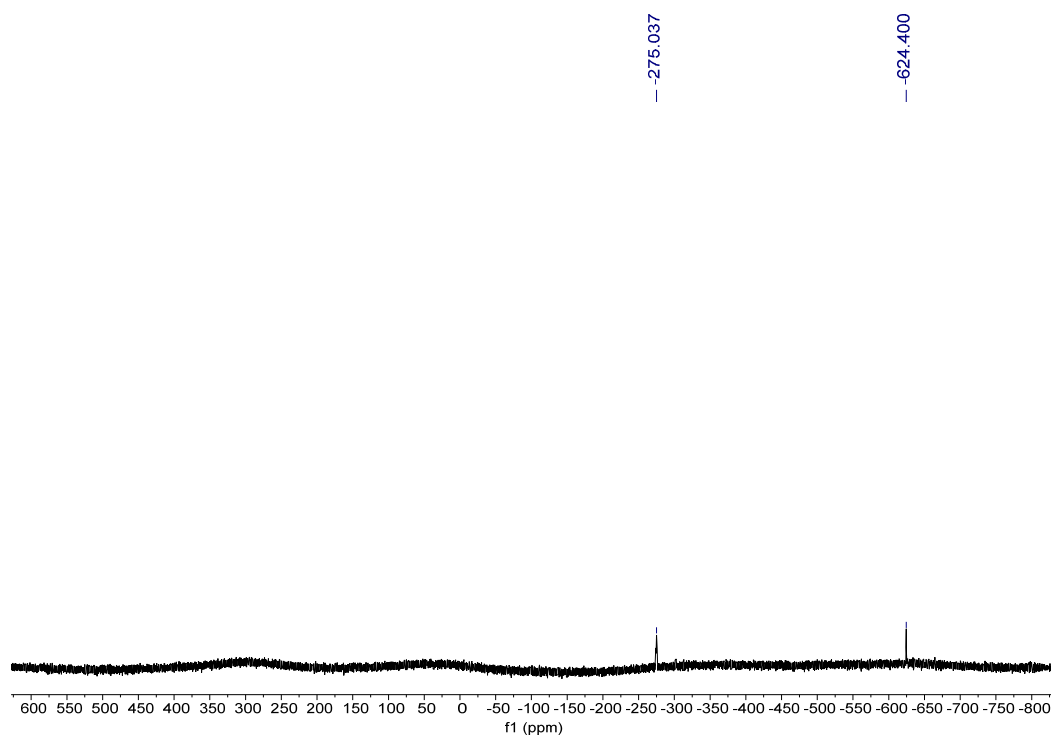

Figure S10.  $^{77}\text{Se}$  NMR (95 MHz,  $\text{C}_6\text{D}_6$ , 25 °C) spectrum of **2**. Assignments:  $\delta = -275.0$  (s),  $-624.4$  (s).

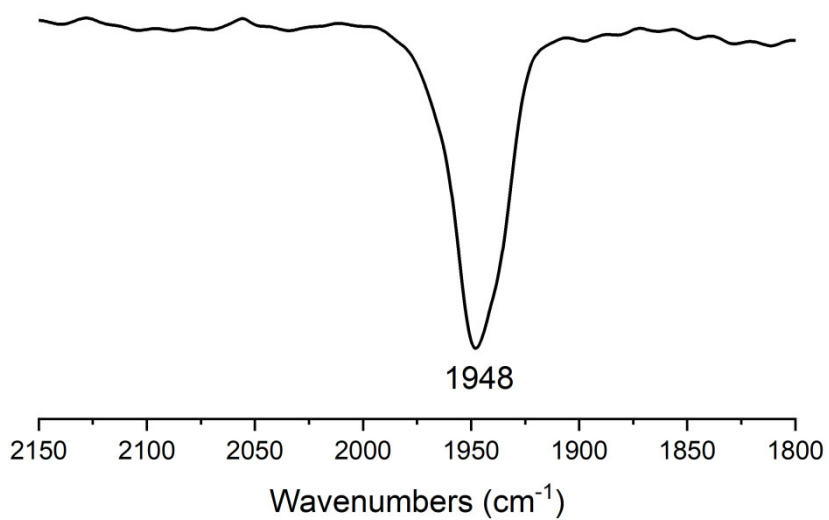

Figure S11. FT-IR ( $\text{CH}_2\text{Cl}_2$ , 25 °C) spectrum of **[3]Cl**. Assignments:  $\nu_{\text{CO}} = 1948 \text{ cm}^{-1}$ .

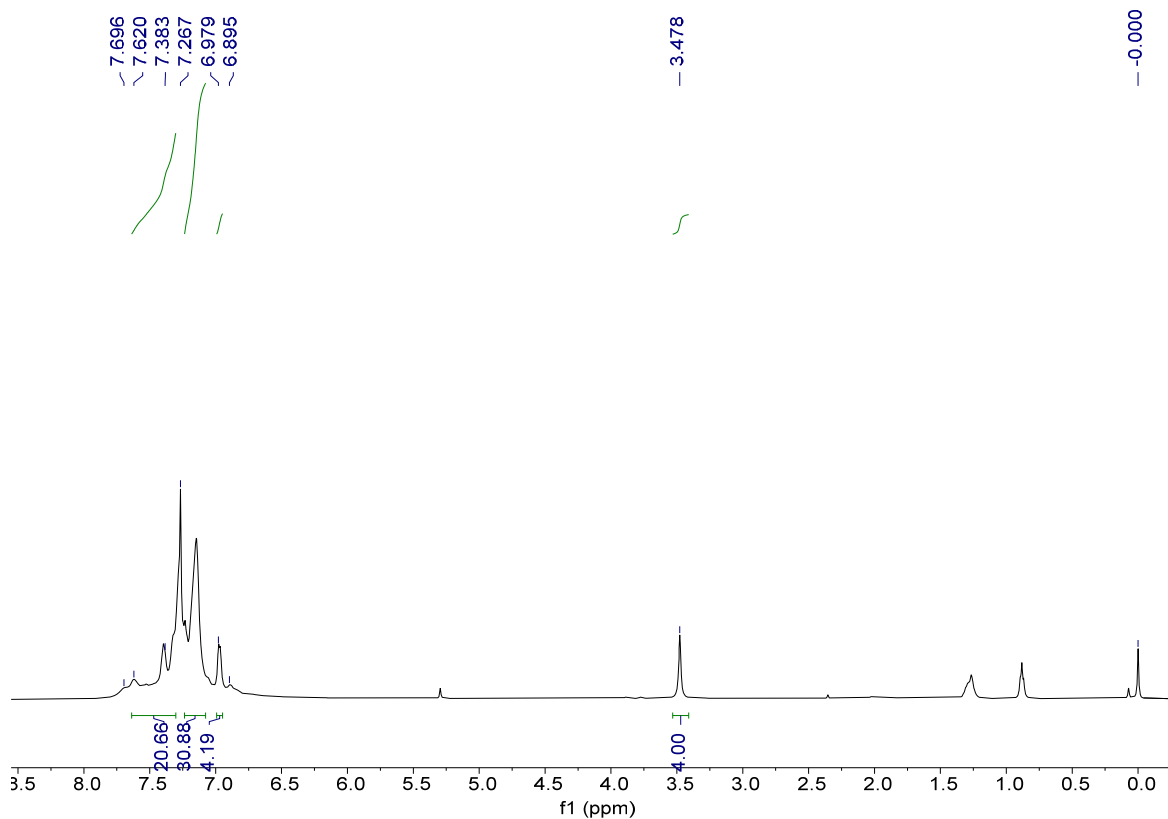

Figure S12.  $^1\text{H}$  NMR (500 MHz,  $\text{CDCl}_3$ , 25  $^\circ\text{C}$ ) spectrum of **[3]Cl**. Assignments:  $\delta = 6.89\text{-}7.69$  (m, 54H,  $10\text{C}_6\text{H}_5$  and  $2\text{CH}=\text{CH}$ ), 3.48 (s, 4H,  $2\text{CH}_2$ ).

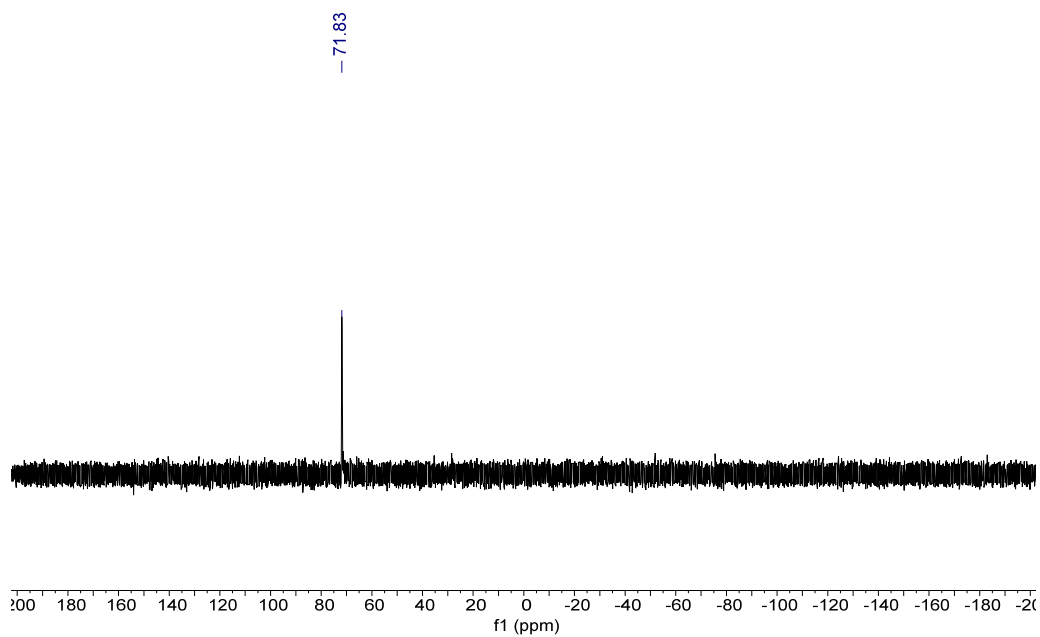

Figure S13.  $^{31}\text{P}$  NMR (202 MHz,  $\text{CDCl}_3$ , 25  $^\circ\text{C}$ ) spectrum of **[3]Cl**. Assignments:  $\delta = 71.8$  (s).



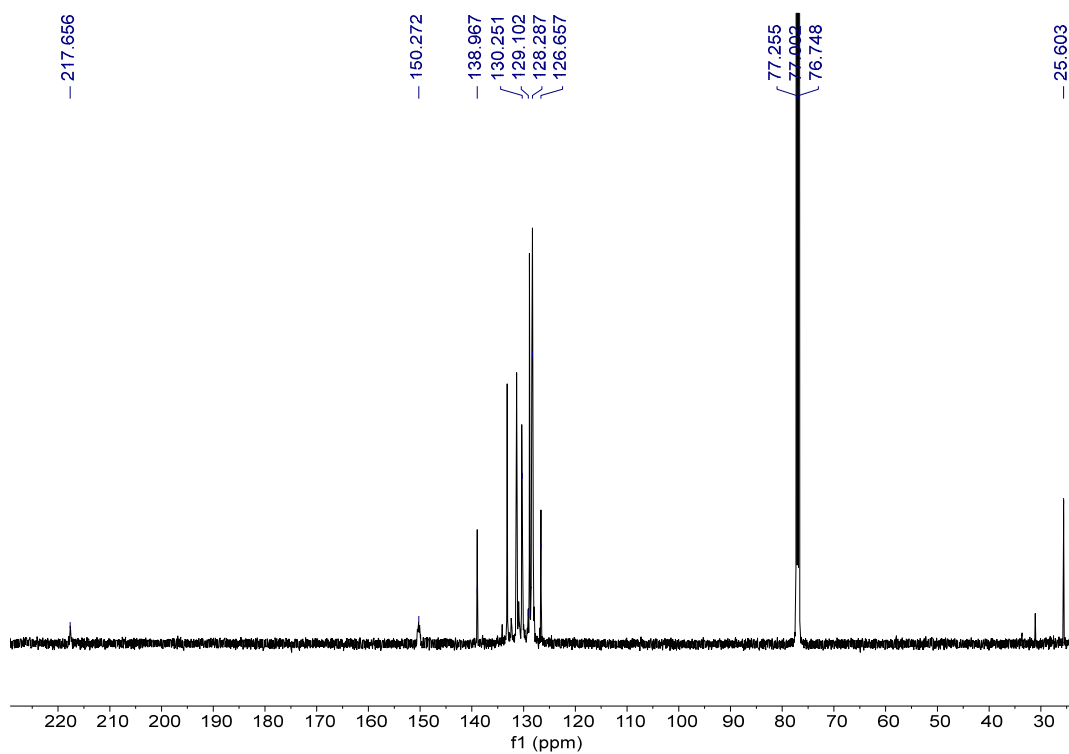

Figure S14.  $^{13}\text{C}$  NMR (126 MHz,  $\text{CDCl}_3$ , 25  $^\circ\text{C}$ ) spectrum of **[3]Cl**. Assignments:  $\delta = 217.7$  (t,  $^2J_{\text{P-C}} = 10.6$  Hz,  $\text{PFeCO}$ ), 150.3-126.7 (m,  $\text{C}_6\text{H}_5$  and  $\text{PCH=CHP}$ ), 25.6 (s,  $\text{CH}_2$ ).

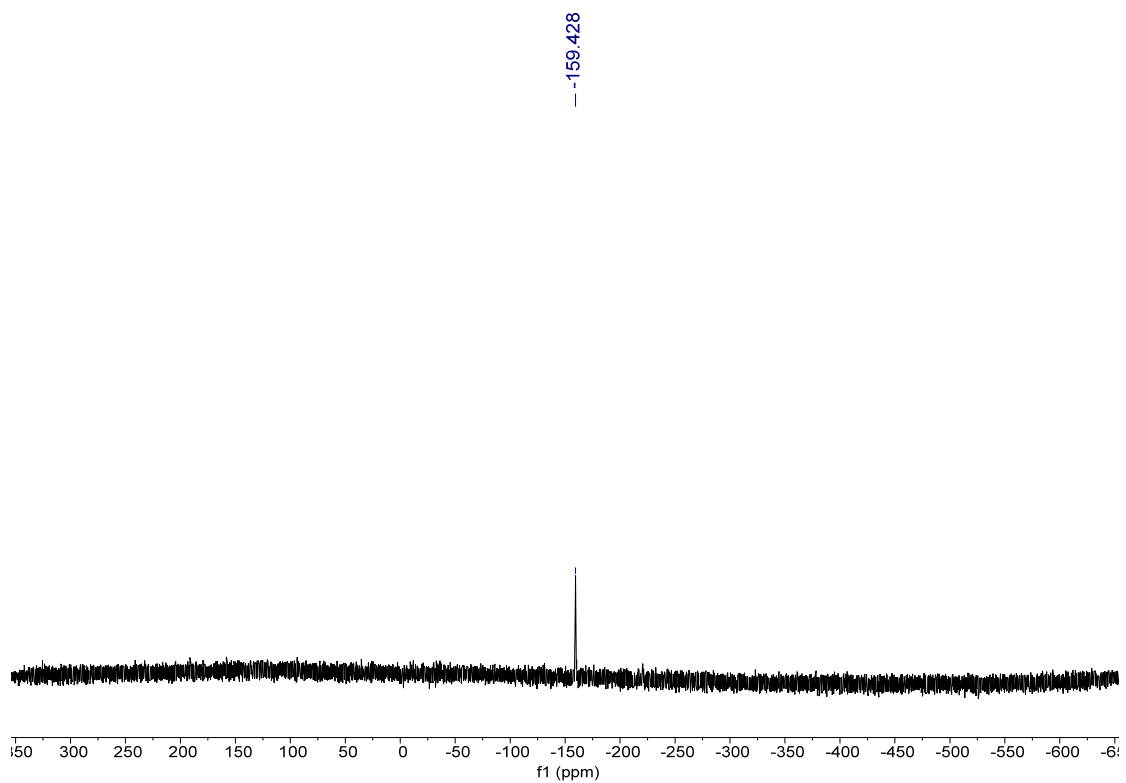

Figure S15.  $^{77}\text{Se}$  NMR (95 MHz,  $\text{CDCl}_3$ , 25  $^\circ\text{C}$ ) spectrum of **[3]Cl**. Assignments:  $\delta = -159.4$  (s).

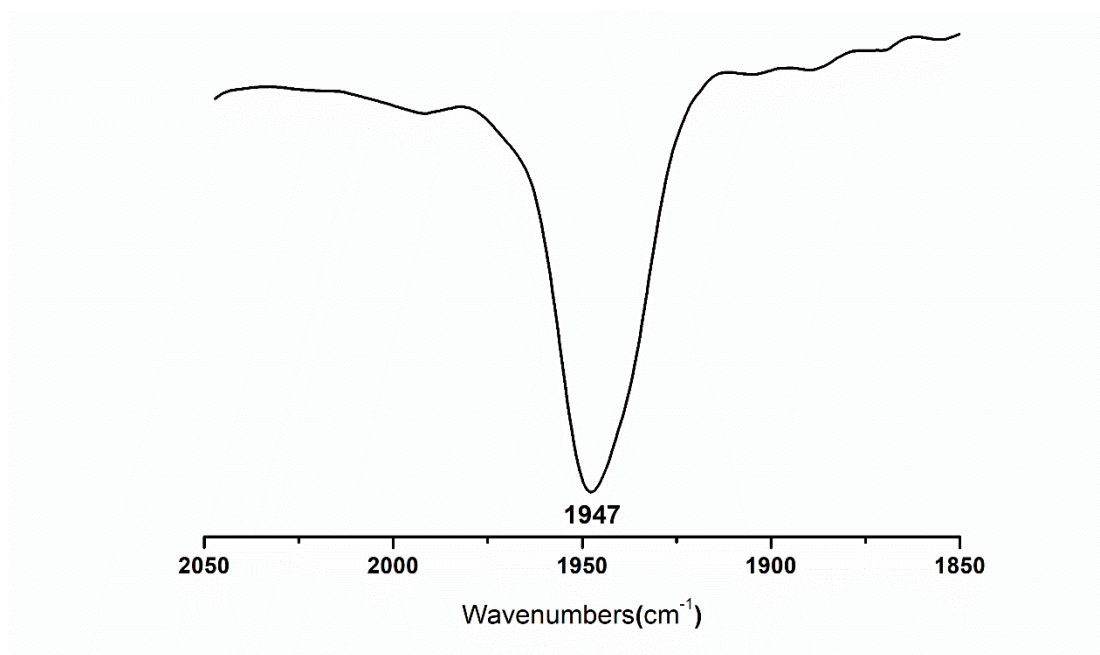

Figure S16. FT-IR ( $\text{CH}_2\text{Cl}_2$ , 25 °C) spectrum of **[4]Br**. *Assignments:*  $\nu_{\text{CO}} = 1947\text{cm}^{-1}$ .

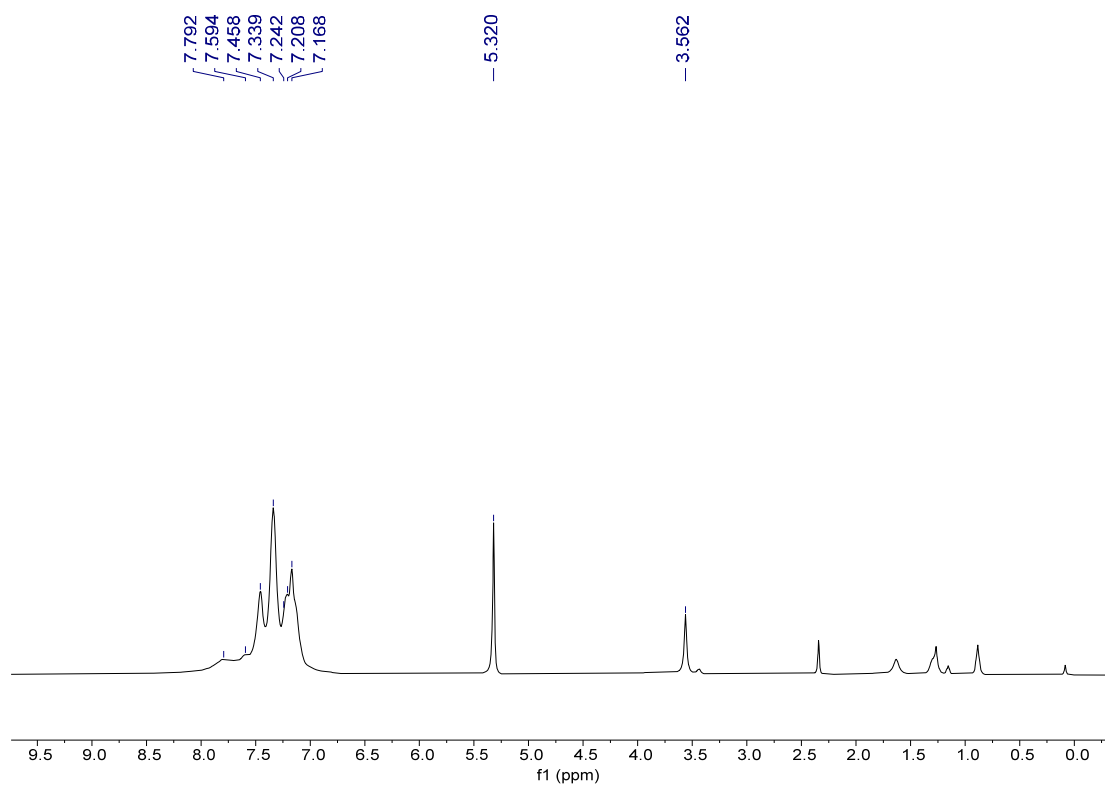

Figure S17.  $^1\text{H}$  NMR (500 MHz,  $\text{CD}_2\text{Cl}_2$ , 25 °C) spectrum of **[4]Br**. *Assignments:*  $\delta = 7.16\text{-}7.79$  (m, 54H,  $10\text{C}_6\text{H}_5$ ,  $2\text{CH}=\text{CH}$ ), 3.56 (s, 4H,  $2\text{CH}_2$ ).

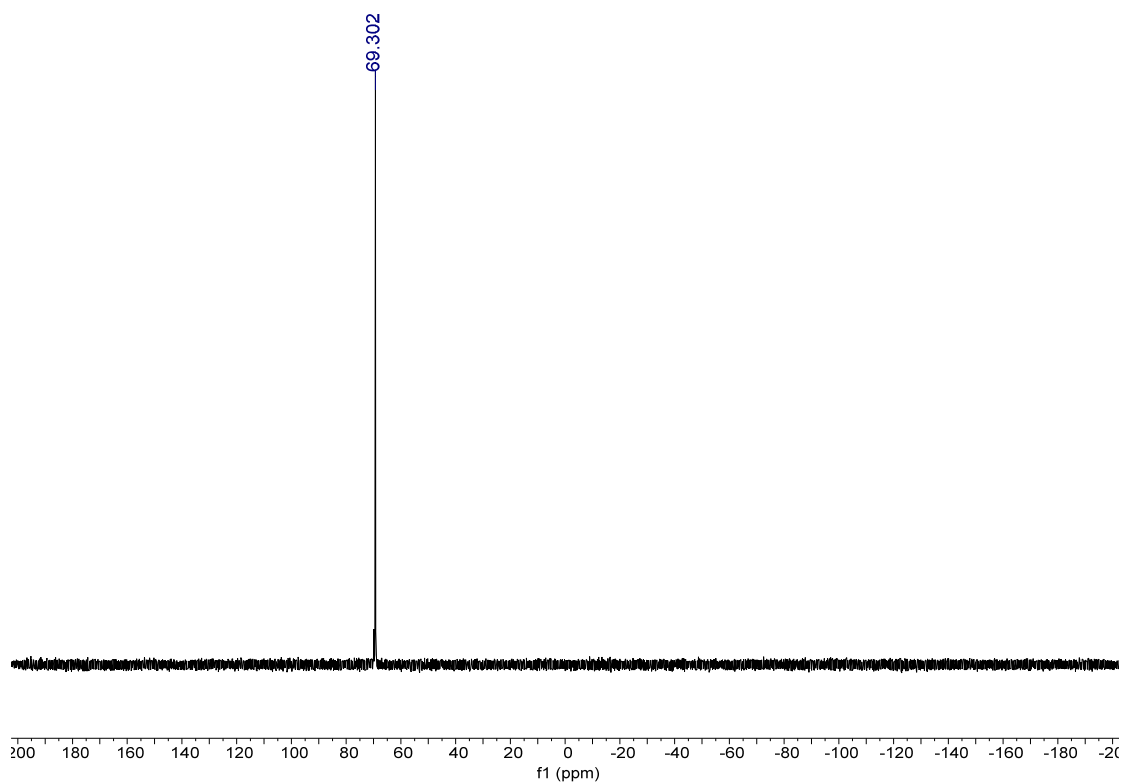

Figure S18.  $^{31}\text{P}$  NMR (202 MHz,  $\text{CD}_2\text{Cl}_2$ , 25 °C) spectrum of **[4]Br**. Assignments:  $\delta = 69.3$

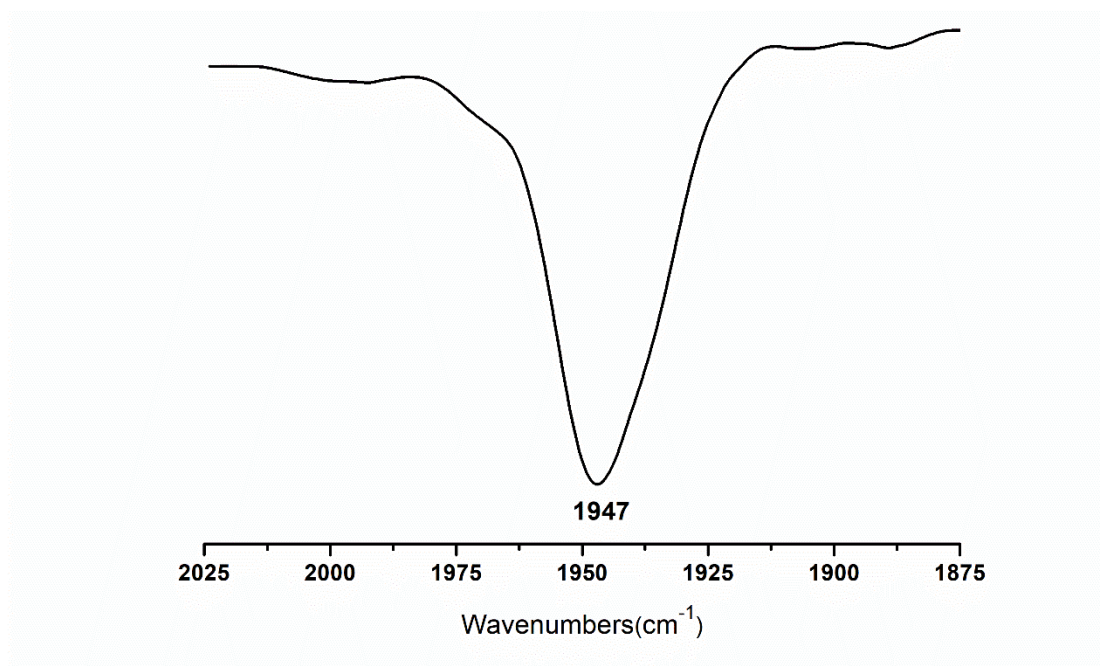

Figure S19. FT-IR ( $\text{CH}_2\text{Cl}_2$ , 25°C) spectrum of **[5]I<sub>3</sub>**. Assignments:  $\nu_{\text{CO}} = 1947 \text{ cm}^{-1}$ .

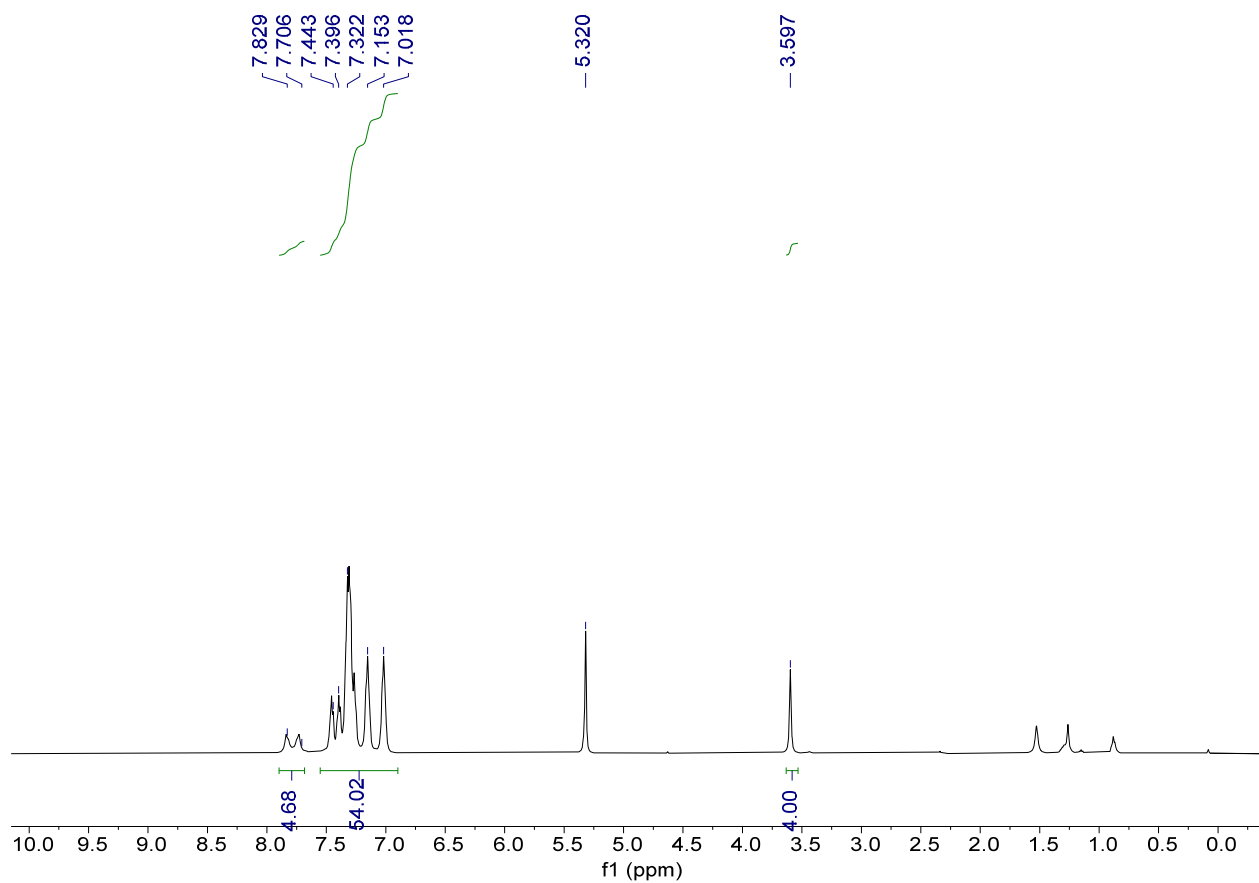

Figure S20.  $^1\text{H}$  NMR (500 MHz,  $\text{CD}_2\text{Cl}_2$ , 25  $^\circ\text{C}$ ) spectrum of  $[\mathbf{5}]\text{I}_3$ . Assignments:  $\delta = 7.01\text{-}7.83$  (m, 54H, 10 $\text{C}_6\text{H}_5$ , 2 $\text{CH}=\text{CH}$ ), 3.60 (s, 4H, 2 $\text{CH}_2$ ).

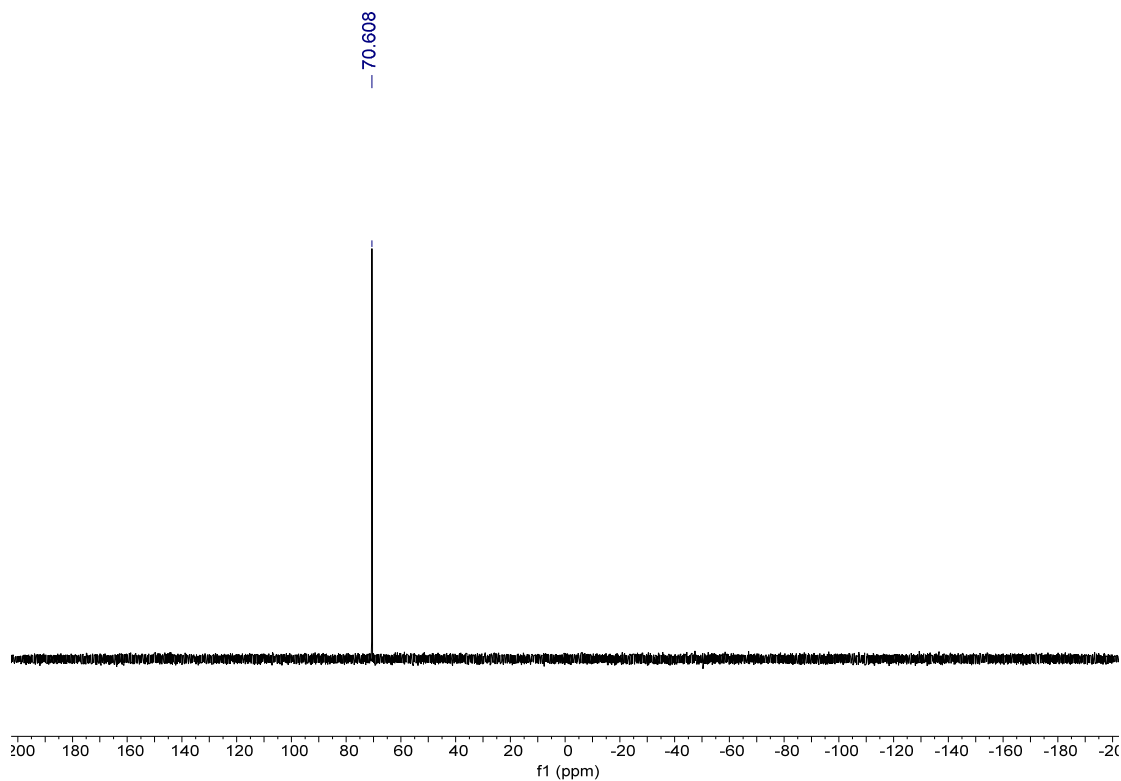

Figure S21.  $^{31}\text{P}$  NMR (202 MHz,  $\text{CD}_2\text{Cl}_2$ , 25  $^\circ\text{C}$ ) spectrum of  $[\mathbf{5}]\text{I}_3$ . Assignments:  $\delta = 70.6$  ppm

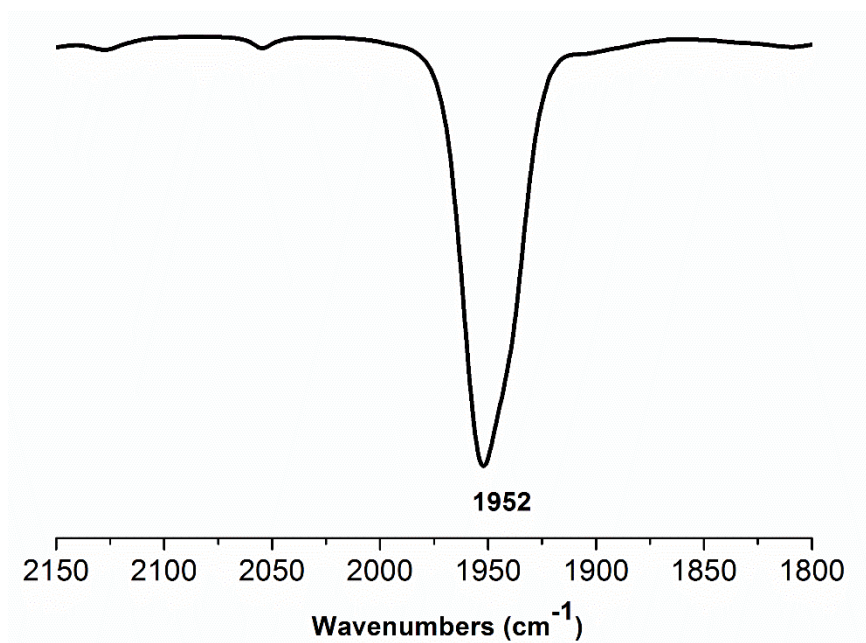

Figure S22. FT-IR ( $\text{CH}_2\text{Cl}_2$ ,  $25^\circ\text{C}$ ) spectrum of  $[\mathbf{6}]\text{Cl}$ . Assignments:  $\nu_{\text{CO}} = 1952 \text{ cm}^{-1}$ .

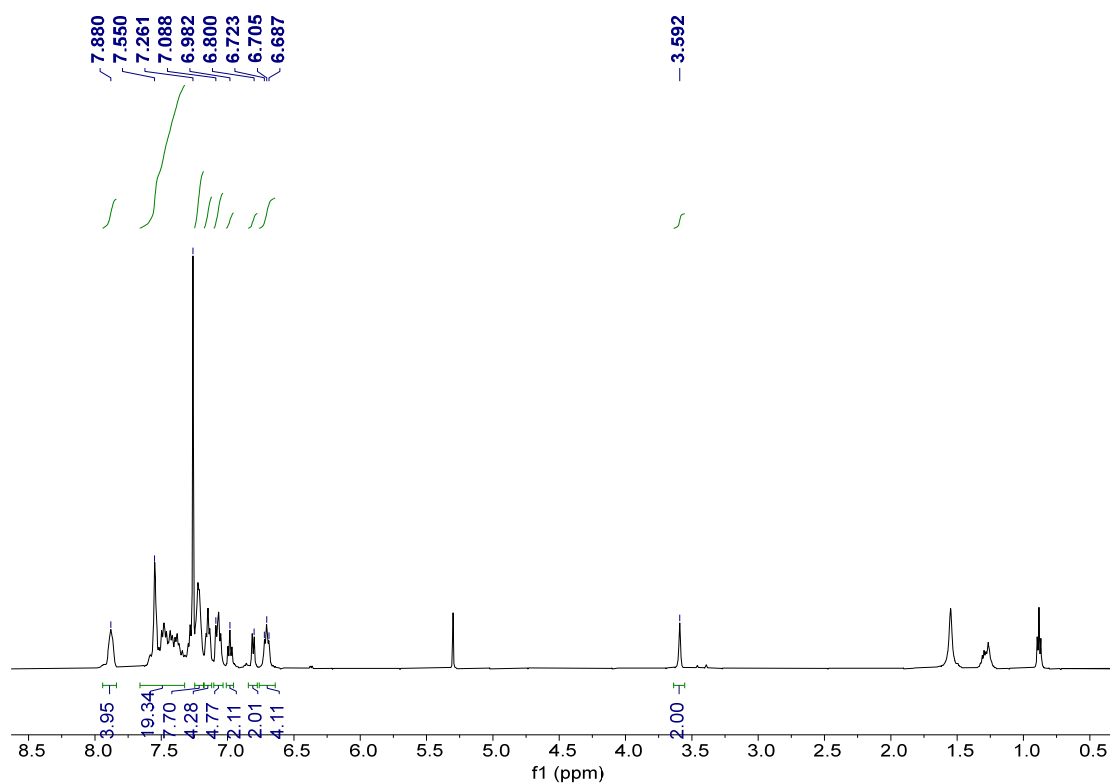

Figure S23.  $^1\text{H}$  NMR (500 MHz,  $\text{CDCl}_3$ ,  $25^\circ\text{C}$ ) spectrum of  $[\mathbf{6}]\text{Cl}$ . Assignments:  $\delta = 6.69\text{-}7.88$  (m, 49H,  $9\text{C}_6\text{H}_5$ ,  $2\text{CH}=\text{CH}$ ), 3.59 (s, 2H,  $\text{CH}_2$ ).

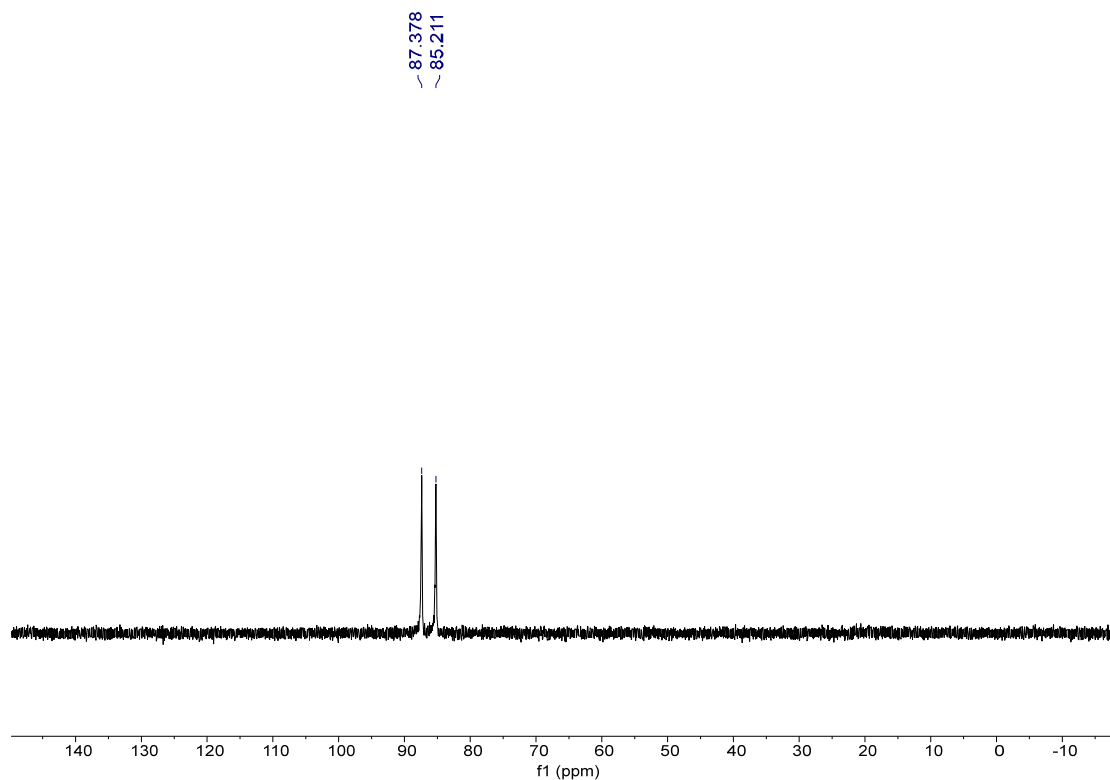

Figure S24.  $^{31}\text{P}$  NMR (202 MHz,  $\text{CDCl}_3$ , 25  $^\circ\text{C}$ ) spectrum of [6]Cl. Assignments:  $\delta = 87.3$  (s), 85.2 (s)

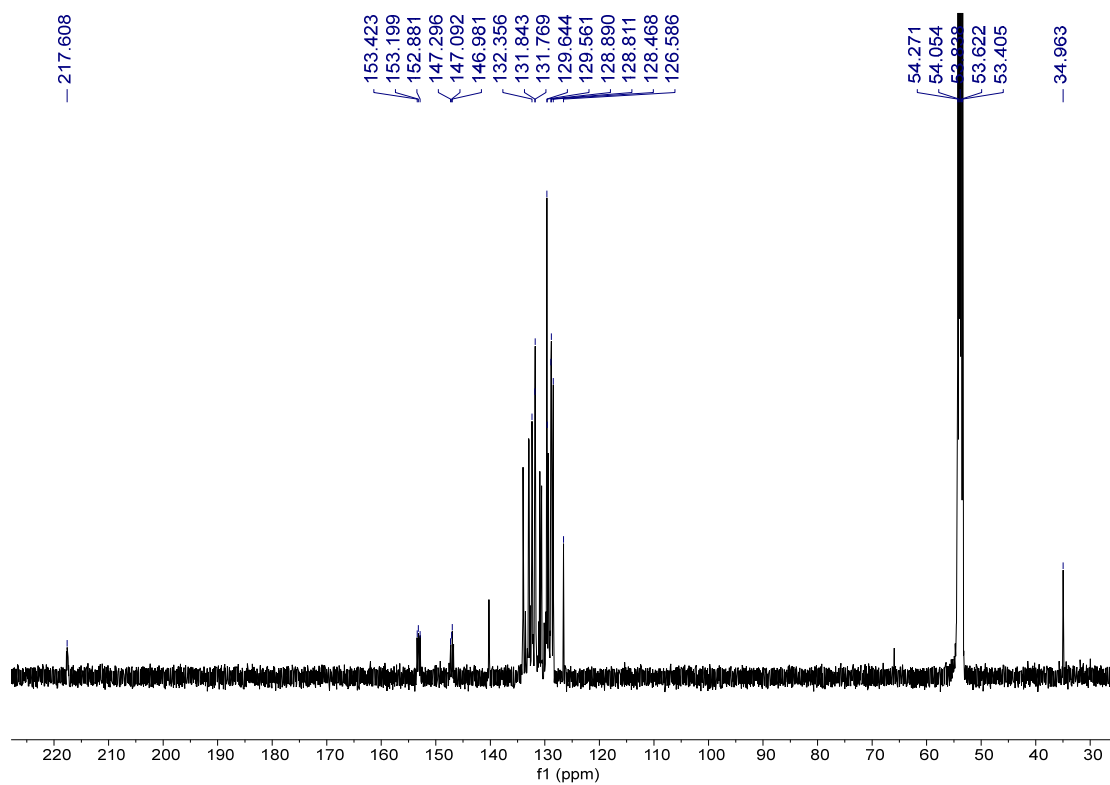

Figure S25.  $^{13}\text{C}$  NMR (126 MHz,  $\text{CD}_2\text{Cl}_2$ , 25  $^\circ\text{C}$ ) spectrum of [6]Cl. Assignments:  $\delta = 217.6$  (t,  $^2J_{\text{P-C}} = 15.8$  Hz,  $\text{PFeCO}$ ), 153.4–126.6 (m,  $\text{C}_6\text{H}_5$  and  $\text{PCH=CHP}$ ), 34.9 (s,  $\text{CH}_2$ ).

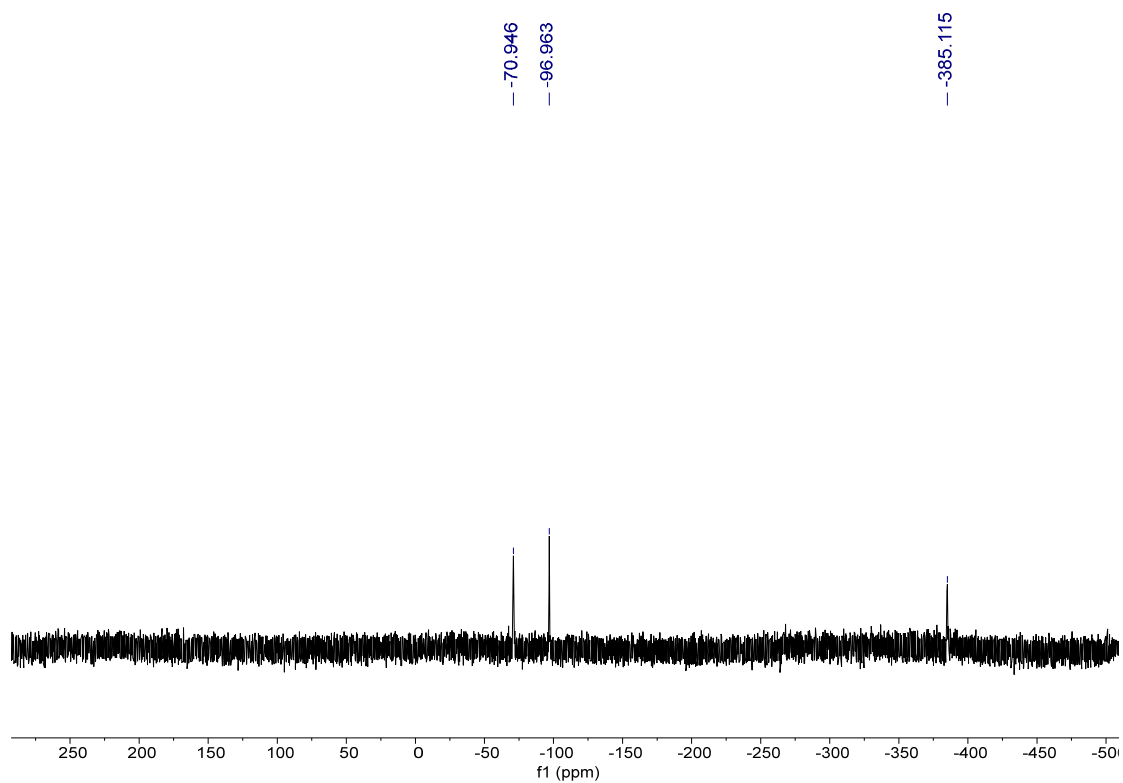

Figure S26.  $^{77}\text{Se}$  NMR (95 MHz,  $\text{CD}_2\text{Cl}_2$ , 25 °C) spectrum of **[6]Cl**. Assignments:  $\delta = -70.9$  (s),  $-97.0$  (s)  $-385.1$  (s).

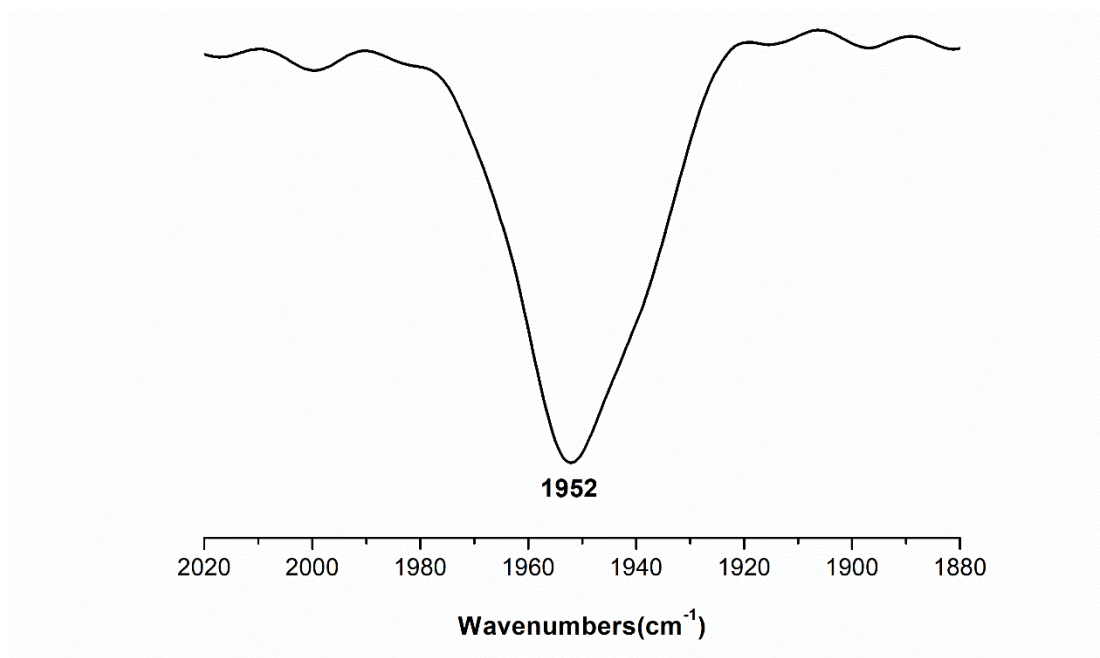

Figure S27. FT-IR ( $\text{CH}_2\text{Cl}_2$ , 25°C) spectrum of **[6]Br**. Assignments:  $\nu_{\text{CO}} = 1952$   $\text{cm}^{-1}$ .

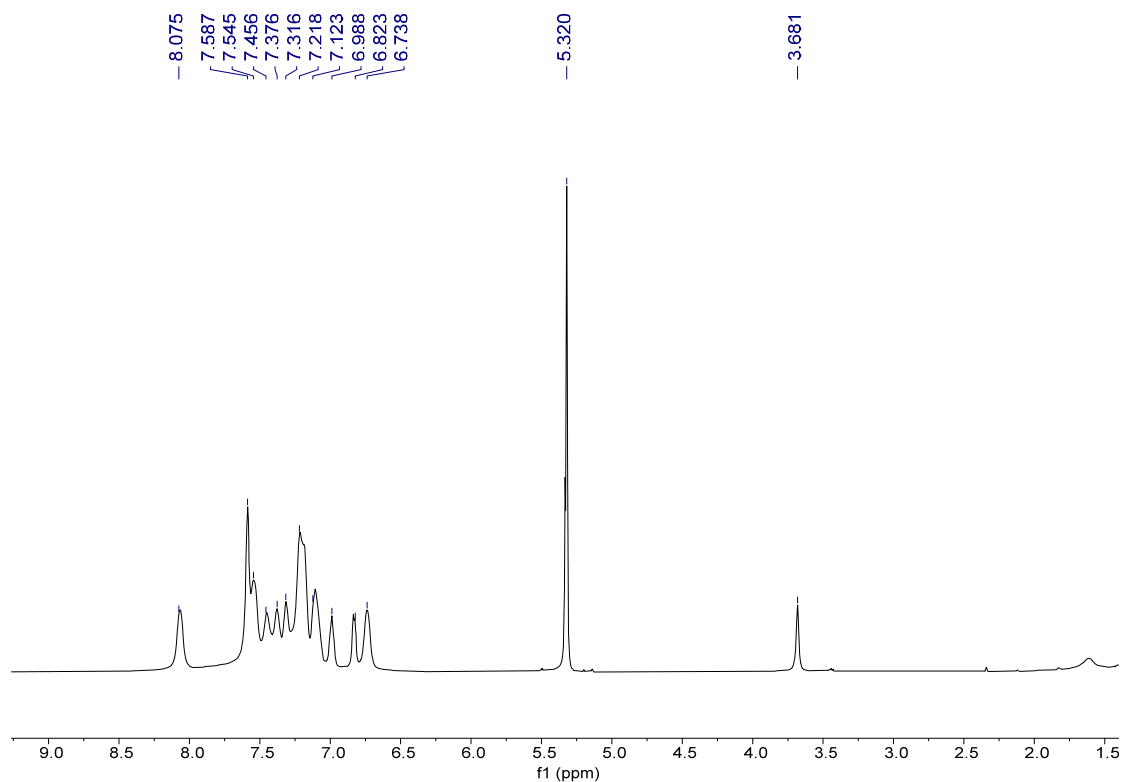

Figure S28.  $^1\text{H}$  NMR (500 MHz,  $\text{CD}_2\text{Cl}_2$ , 25  $^\circ\text{C}$ ) spectrum of **[6]Br**. Assignments:  $\delta = 6.74\text{-}8.07$  (m, 49H,  $9\text{C}_6\text{H}_5$ ,  $2\text{CH}=\text{CH}$ ), 3.68 (s, 2H,  $\text{CH}_2$ ).

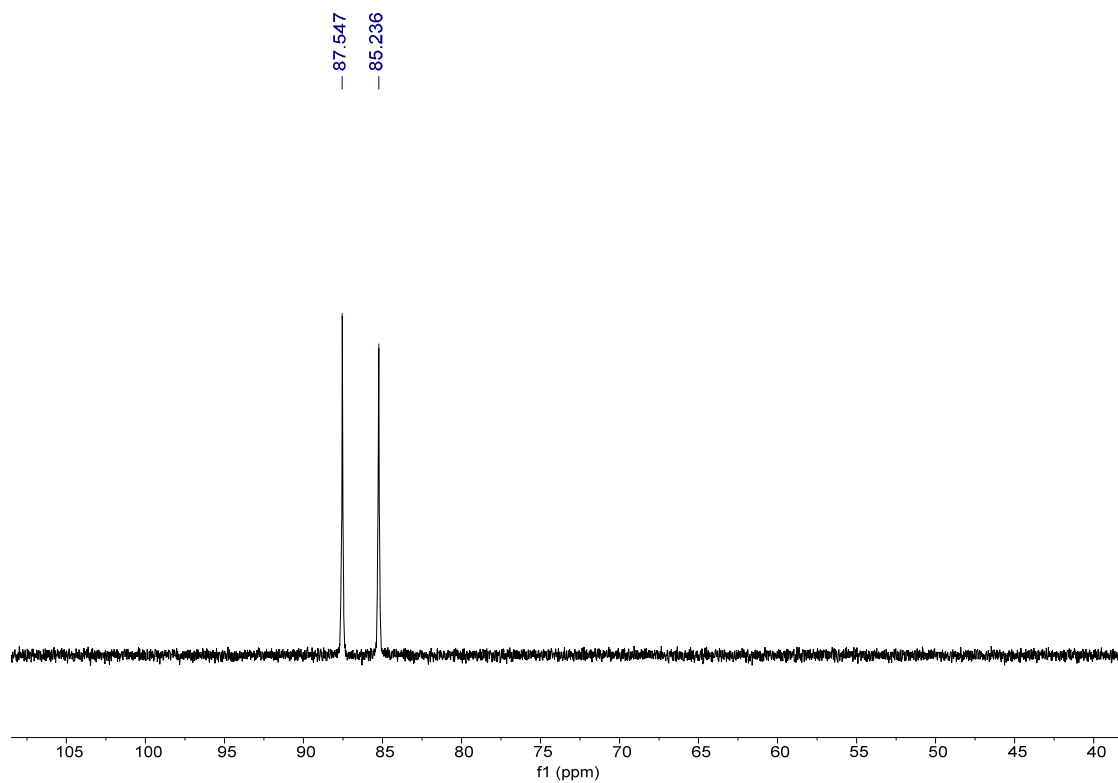

Figure S29.  $^{31}\text{P}$  NMR (202 MHz,  $\text{CD}_2\text{Cl}_2$ , 25  $^\circ\text{C}$ ) spectrum of **[6]Br**. Assignments:  $\delta = 87.5$ (s), 85.2 (s).



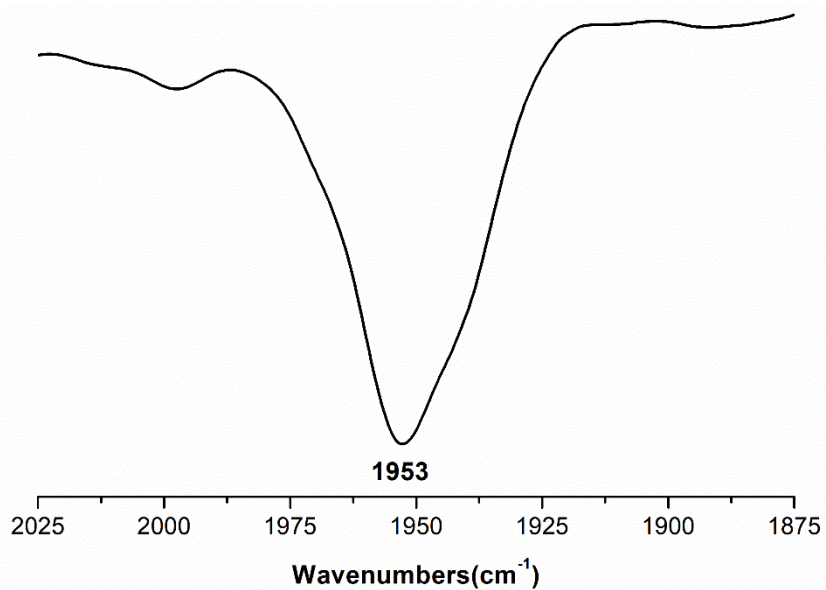

Figure S30. FT-IR ( $\text{CH}_2\text{Cl}_2$ ,  $25^\circ\text{C}$ ) spectrum of **[6]I<sub>3</sub>**. *Assignments:*  $\nu_{\text{CO}} = 1953 \text{ cm}^{-1}$ .

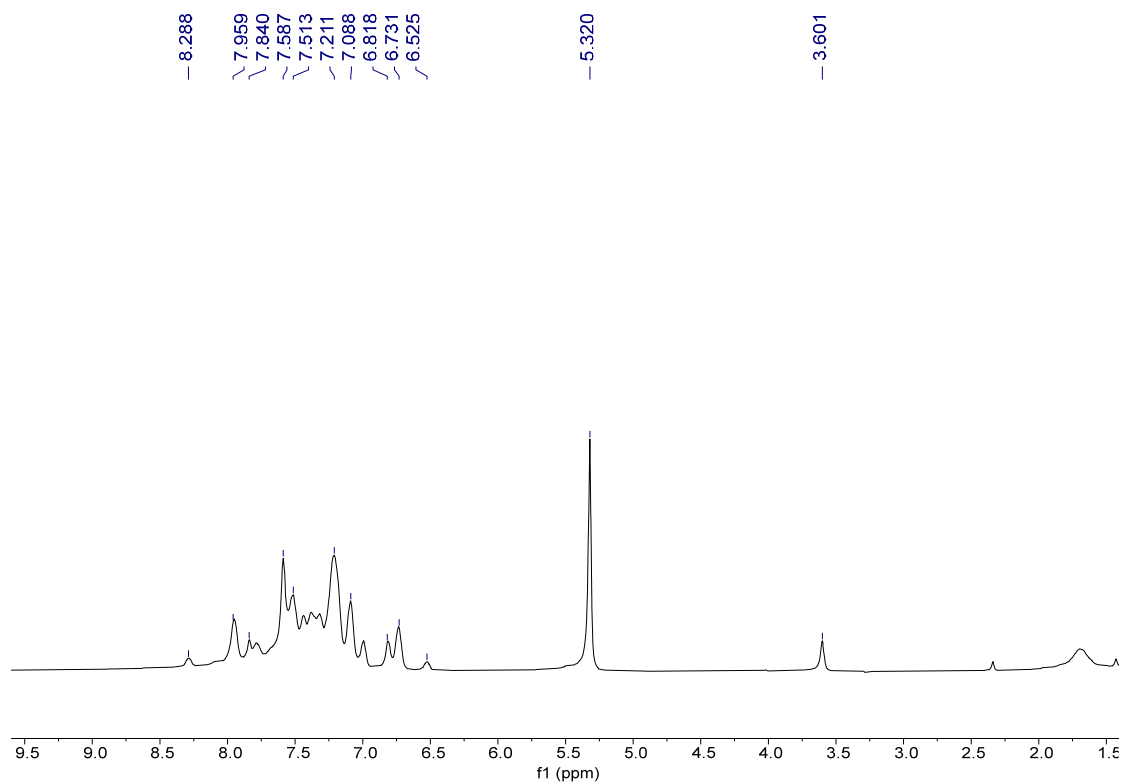

Figure S31.  $^1\text{H}$  NMR (500 MHz,  $\text{CD}_2\text{Cl}_2$ ,  $25^\circ\text{C}$ ) spectrum of **[6]I<sub>3</sub>**. *Assignments:*  $\delta = 6.53\text{-}8.29$  (m, 49H,  $9\text{C}_6\text{H}_5$ ,  $2\text{CH}=\text{CH}$ ), 3.60 (s, 2H,  $\text{CH}_2$ ).

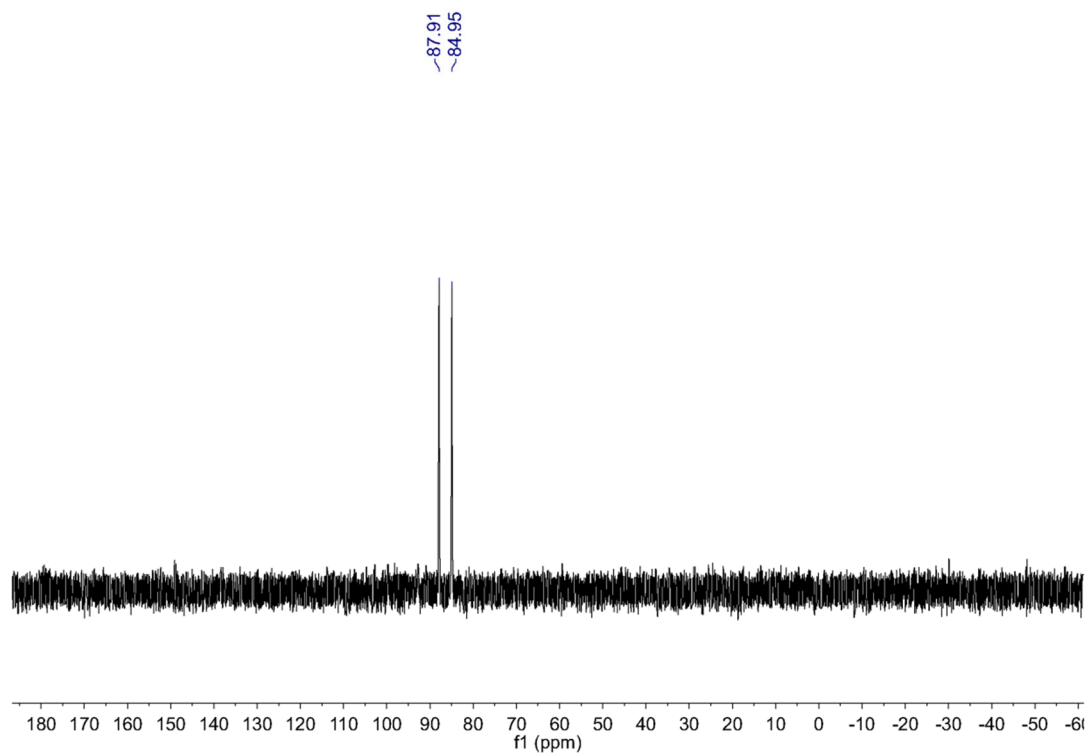

Figure S32.  $^{31}\text{P}$  NMR (202 MHz,  $\text{CD}_2\text{Cl}_2$ , 25 °C) spectrum of  $[\mathbf{6}]^+\text{I}_3^-$ . Assignments:  $\delta = 87.9$  (s), 85.0(s).

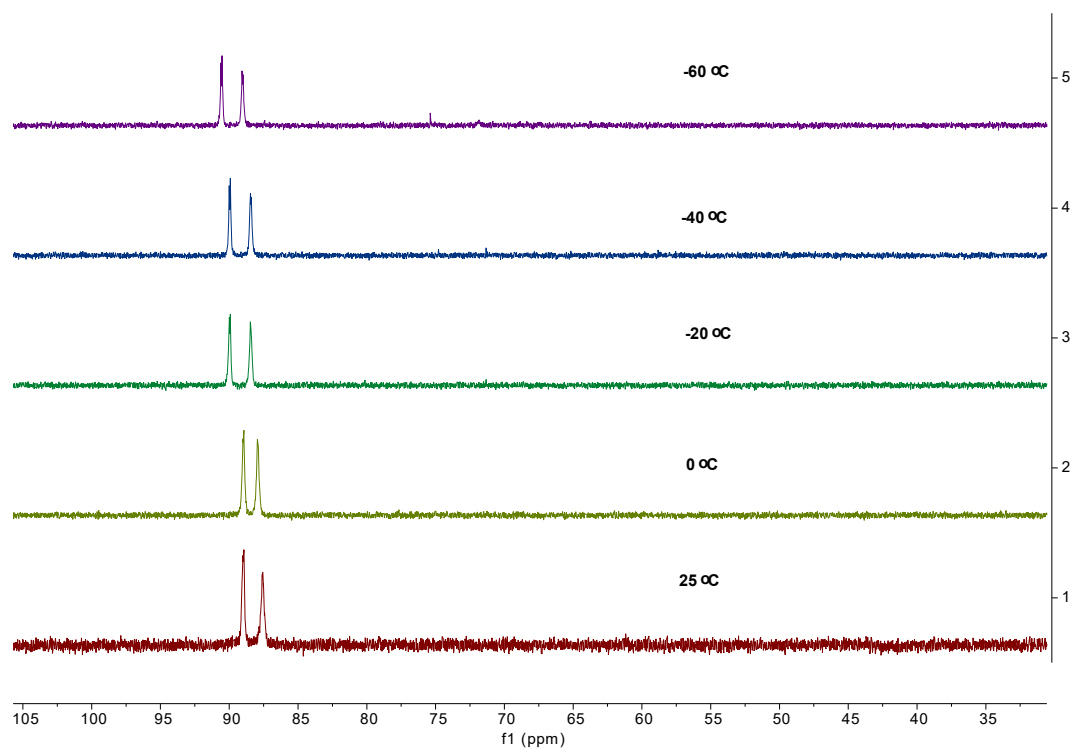

Figure S33. Variable-temperature  $^{31}\text{P}$  NMR spectra of a  $\text{CH}_2\text{Cl}_2$  solution of **1**.

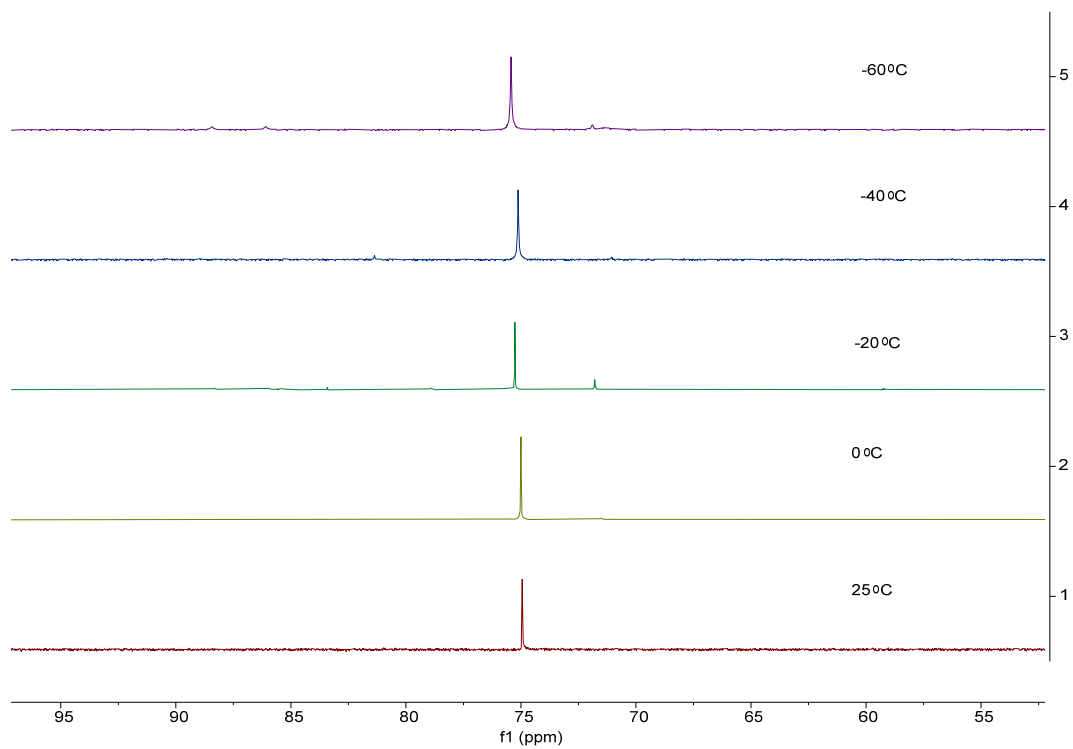

Figure S34. Variable-temperature  $^{31}\text{P}$  NMR spectra of a  $\text{CH}_2\text{Cl}_2$  solution of **2**.

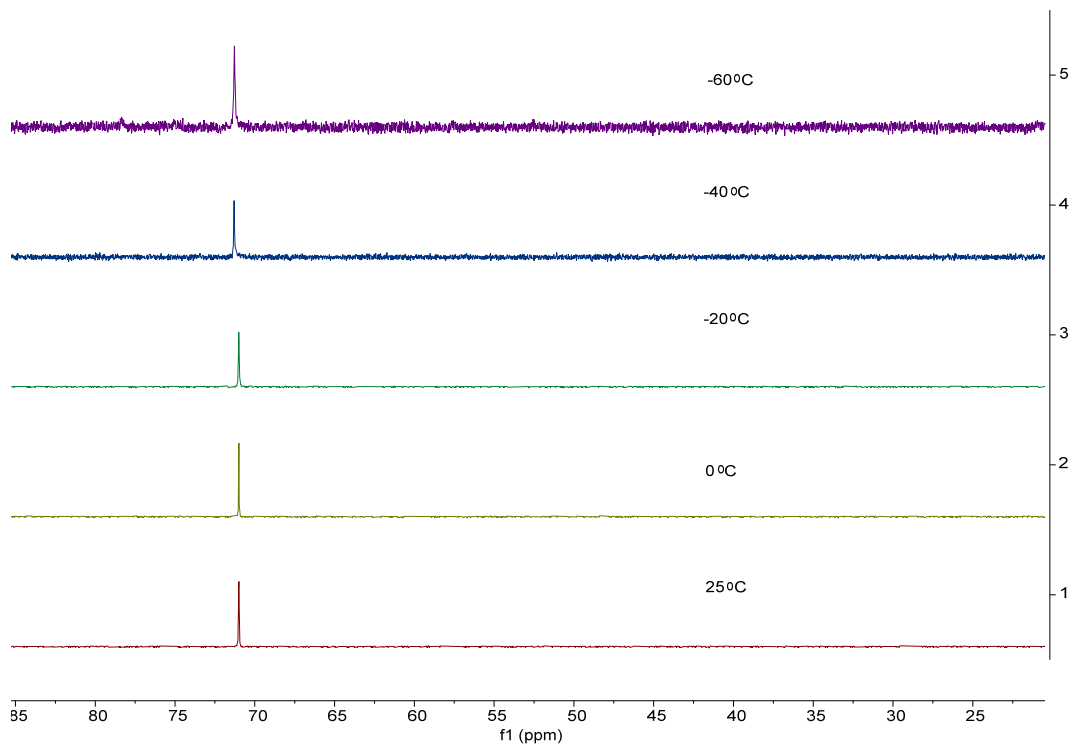

Figure S35. Variable-temperature  $^{31}\text{P}$  NMR spectra of a  $\text{CH}_2\text{Cl}_2$  solution of **[3]Cl**.

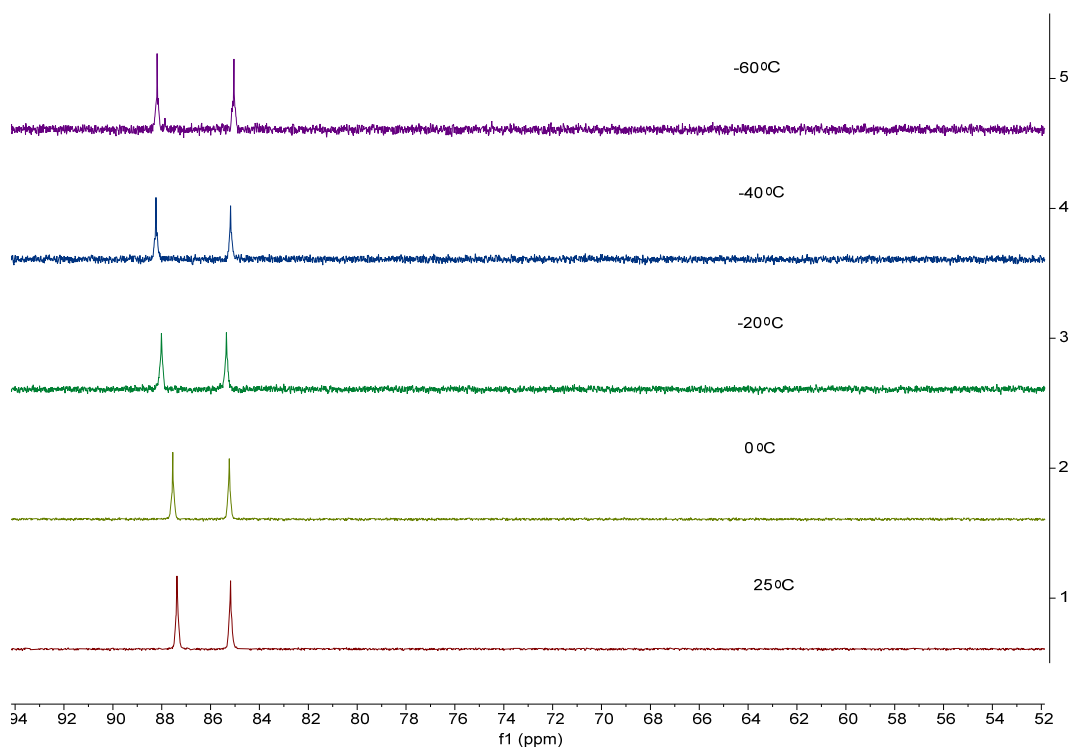

Figure S36. Variable-temperature  $^{31}\text{P}$  NMR spectra of a  $\text{CH}_2\text{Cl}_2$  solution of  $[\mathbf{6}]\text{Cl}$ .

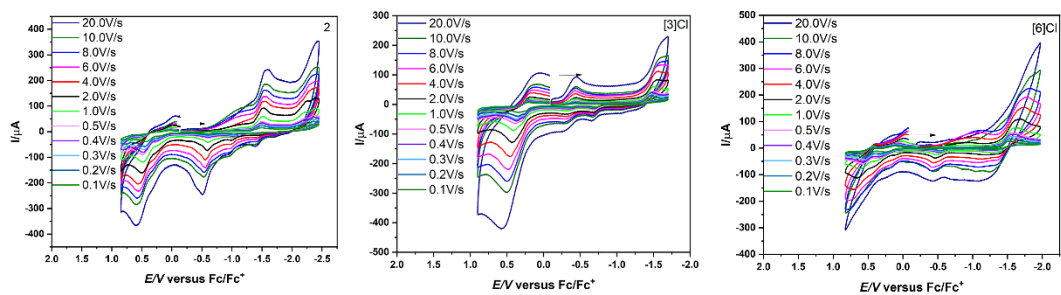

Figure S37. Cyclic voltammogram of complexes  $\mathbf{2}$ ,  $[\mathbf{3}]\text{Cl}$  and  $[\mathbf{6}]\text{Cl}$  (1.0 mM) in 0.1 M  $n\text{-Bu}_4\text{NPF}_6/\text{MeCN}$  at a scan rate of 0.1–20  $\text{V s}^{-1}$  (Scan direction was towards negative potential).

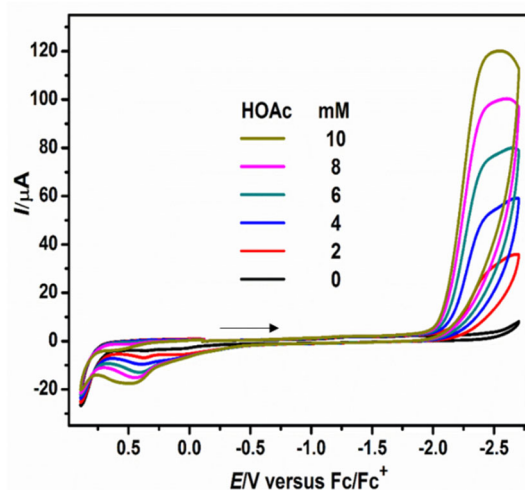

Figure S38. Cyclic voltammogram of  $\text{CH}_3\text{CO}_2\text{H}$  (0-10 mM) in 0.1M  $n\text{-Bu}_4\text{NPF}_6/\text{MeCN}$  at a scan rate of  $0.1 \text{ V s}^{-1}$  (Scan direction was towards negative potential).

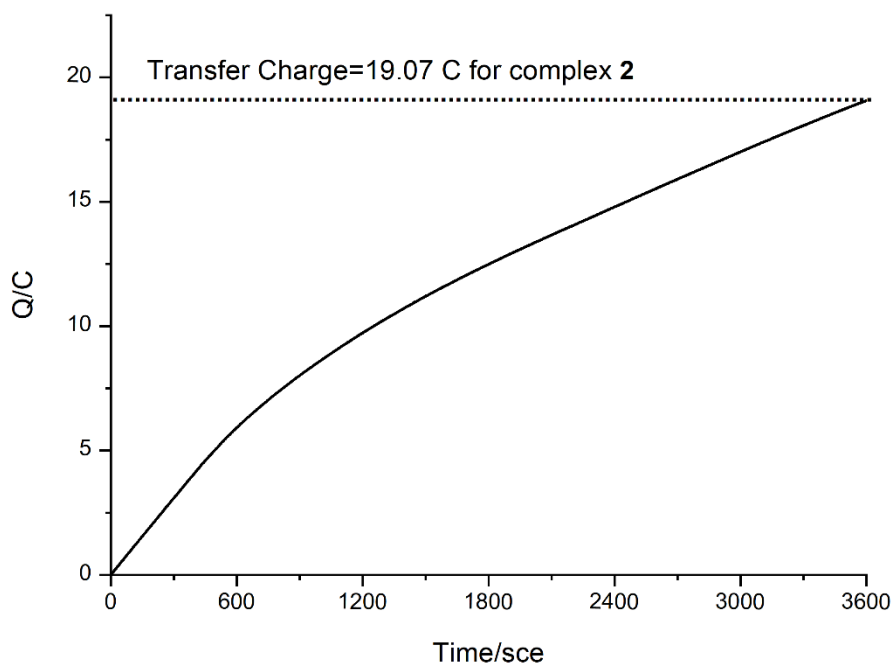

Figure S39. Bulk electrolysis experiment (Q-t curve) of complex **2** (0.5 mM) in 30 mM  $\text{CH}_3\text{CO}_2\text{H}/\text{MeCN}$  solution for 1 h

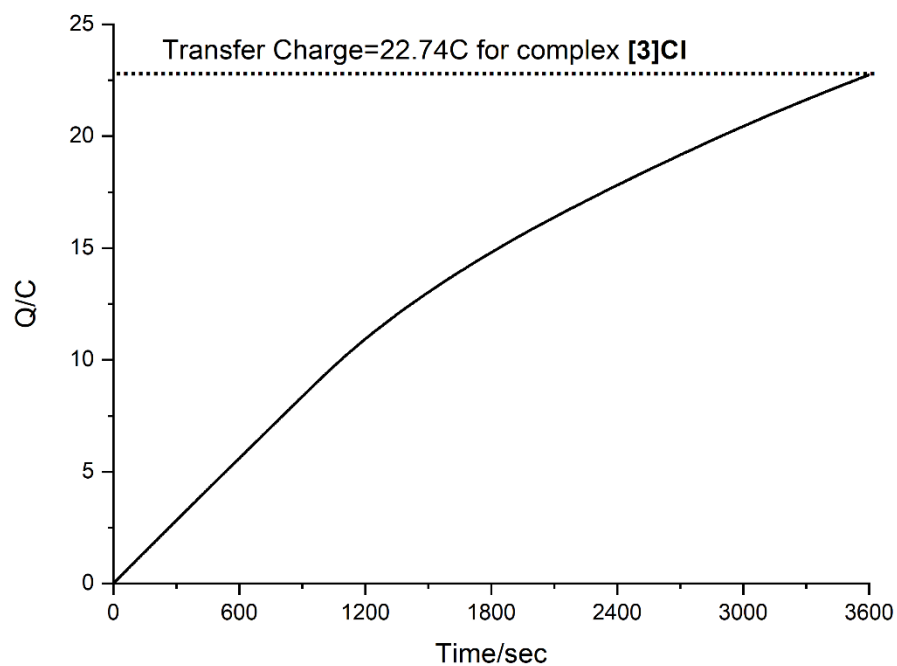

Figure S40. Bulk electrolysis experiment (Q-t curve) of complex [3]Cl (0.5 mM) in 30 mM CH<sub>3</sub>CO<sub>2</sub>H/MeCN solution for 1 h

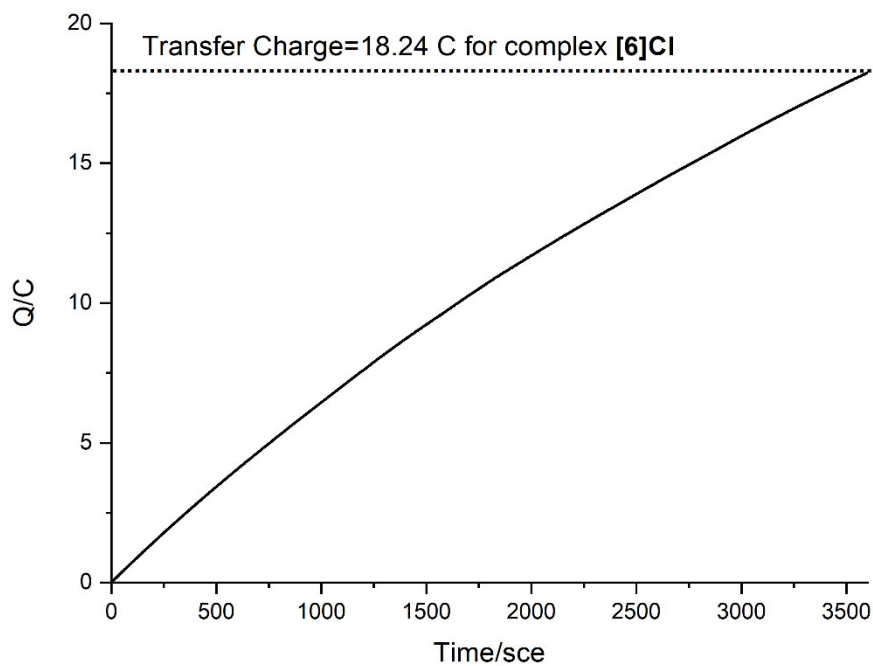

Figure S41. Bulk electrolysis experiment (Q-t curve) of complex [6]Cl (0.5 mM) in 30 mM CH<sub>3</sub>CO<sub>2</sub>H/MeCN solution for 1 h

Table S1. Crystal data and structure refinement parameters for complexes **1**, **2** [3]Cl and [4]Br.

| Complex                    | <b>1</b>                                                                                                      | <b>2</b>                                                                                      | [3]Cl                                                                                                          | [4]Br                                                                                                         |
|----------------------------|---------------------------------------------------------------------------------------------------------------|-----------------------------------------------------------------------------------------------|----------------------------------------------------------------------------------------------------------------|---------------------------------------------------------------------------------------------------------------|
| Mol formula                | C <sub>69</sub> H <sub>60</sub> Cl <sub>2</sub> Fe <sub>2</sub> O <sub>2</sub> P <sub>4</sub> Se <sub>2</sub> | C <sub>68</sub> H <sub>58</sub> Fe <sub>2</sub> O <sub>2</sub> P <sub>4</sub> Se <sub>3</sub> | C <sub>73</sub> H <sub>63</sub> Cl <sub>17</sub> Fe <sub>2</sub> O <sub>2</sub> P <sub>4</sub> Se <sub>2</sub> | C <sub>68</sub> H <sub>58</sub> Br <sub>2</sub> Fe <sub>2</sub> O <sub>2</sub> P <sub>4</sub> Se <sub>2</sub> |
| Mol wt                     | 1385.57                                                                                                       | 1379.6                                                                                        | 1968.38                                                                                                        | 1460.46                                                                                                       |
| Wavelength (Å)             | 0.71073                                                                                                       | 0.71073                                                                                       | 1.54178                                                                                                        | 0.71073                                                                                                       |
| Crystal system             | Triclinic                                                                                                     | Monoclinic                                                                                    | Triclinic                                                                                                      | Orthorhombic                                                                                                  |
| Space group                | P -1                                                                                                          | C c                                                                                           | P -1                                                                                                           | P n m a                                                                                                       |
| a (Å)                      | 13.0628(11)                                                                                                   | 23.121(2)                                                                                     | 11.1715(4)                                                                                                     | 20.426(2)                                                                                                     |
| b (Å)                      | 13.2184(13)                                                                                                   | 14.3052(11)                                                                                   | 19.6825(7)                                                                                                     | 18.0567(19)                                                                                                   |
| c (Å)                      | 21.5736(18)                                                                                                   | 20.9130(16)                                                                                   | 19.9482(7)                                                                                                     | 21.292(2)                                                                                                     |
| a (°)                      | 85.832(3)                                                                                                     | 90                                                                                            | 87.753(2)                                                                                                      | 90                                                                                                            |
| b (°)                      | 73.911(2)                                                                                                     | 116.972(4)                                                                                    | 76.726(2)                                                                                                      | 90                                                                                                            |
| g (°)                      | 61.5680(10)                                                                                                   | 90                                                                                            | 75.410(2)                                                                                                      | 90                                                                                                            |
| V/Å <sup>3</sup>           | 3139.7(5)                                                                                                     | 6164.7(9)                                                                                     | 4130.6(3)                                                                                                      | 7853.0(13)                                                                                                    |
| Z                          | 2                                                                                                             | 4                                                                                             | 2                                                                                                              | 4                                                                                                             |
| Dcalc (Mg/m <sup>3</sup> ) | 1.466                                                                                                         | 1.486                                                                                         | 1.583                                                                                                          | 1.235                                                                                                         |
| abs coeff/mm <sup>-1</sup> | 1.853                                                                                                         | 2.39                                                                                          | 9.965                                                                                                          | 2.431                                                                                                         |
| F(000)                     | 1408                                                                                                          | 2784                                                                                          | 1972                                                                                                           | 2928                                                                                                          |
| index ranges               | -15<=h<=8<br>-15<=k<=12<br>-25<=l<=25                                                                         | -27<=h<=23<br>-17<=k<=15<br>-24<=l<=24                                                        | -13<=h<=13<br>-23<=k<=23<br>-23<=l<=23                                                                         | 0<=h<=24<br>0<=k<=21<br>0<=l<=25                                                                              |
| no. of reflns              | 15562                                                                                                         | 15163                                                                                         | 42965                                                                                                          | 7075                                                                                                          |
| no. of indepreflns         | 10822                                                                                                         | 7744                                                                                          | 14336                                                                                                          | 7075                                                                                                          |
| Goodness of fit            | 0.964                                                                                                         | 0.969                                                                                         | 1.079                                                                                                          | 0.751                                                                                                         |
| R                          | 0.0652                                                                                                        | 0.0309                                                                                        | 0.0915                                                                                                         | 0.0846                                                                                                        |
| Rw                         | 0.1906                                                                                                        | 0.0597                                                                                        | 0.2498                                                                                                         | 0.1667                                                                                                        |

Table S2. Crystal data and structure refinement parameters for complexes [5]I<sub>3</sub>, [6]Cl [6]Br and [6]I<sub>3</sub>.

| Complex                    | [5]I <sub>3</sub>                                                                                            | [6]Cl                                                                                                         | [6]Br                                                                                           | [6]I <sub>3</sub>                                                                                            |
|----------------------------|--------------------------------------------------------------------------------------------------------------|---------------------------------------------------------------------------------------------------------------|-------------------------------------------------------------------------------------------------|--------------------------------------------------------------------------------------------------------------|
| Mol formula                | C <sub>68</sub> H <sub>58</sub> Fe <sub>2</sub> I <sub>4</sub> O <sub>2</sub> P <sub>4</sub> Se <sub>2</sub> | C <sub>62</sub> H <sub>53</sub> Cl <sub>3</sub> Fe <sub>2</sub> O <sub>2</sub> P <sub>4</sub> Se <sub>3</sub> | C <sub>61</sub> H <sub>51</sub> BrFe <sub>2</sub> O <sub>2</sub> P <sub>4</sub> Se <sub>3</sub> | C <sub>61</sub> H <sub>51</sub> Fe <sub>2</sub> I <sub>3</sub> O <sub>2</sub> P <sub>4</sub> Se <sub>3</sub> |
| Mol wt                     | 1808.24                                                                                                      | 1408.85                                                                                                       | 1368.38                                                                                         | 1669.17                                                                                                      |
| Wavelength (Å)             | 0.71073                                                                                                      | 0.71073                                                                                                       | 0.71073                                                                                         | 0.71073                                                                                                      |
| Crystal system             | Orthorhombic                                                                                                 | Monoclinic                                                                                                    | Monoclinic                                                                                      | Monoclinic                                                                                                   |
| Space group                | P n m a                                                                                                      | P 21/n                                                                                                        | P 21/n                                                                                          | P 21/n                                                                                                       |
| a (Å)                      | 20.5995(19)                                                                                                  | 11.5638(9)                                                                                                    | 11.8315(11)                                                                                     | 23.086(3)                                                                                                    |
| b (Å)                      | 18.8685(16)                                                                                                  | 25.932(2)                                                                                                     | 27.630(3)                                                                                       | 12.1078(15)                                                                                                  |
| c (Å)                      | 21.390(2)                                                                                                    | 20.0938(18)                                                                                                   | 19.418(2)                                                                                       | 27.073(3)                                                                                                    |
| a (°)                      | 90                                                                                                           | 90                                                                                                            | 90                                                                                              | 90                                                                                                           |
| b (°)                      | 90                                                                                                           | 92.552(2)                                                                                                     | 93.403(3)                                                                                       | 111.492(5)                                                                                                   |
| g (°)                      | 90                                                                                                           | 90                                                                                                            | 90                                                                                              | 90                                                                                                           |
| V/Å <sup>3</sup>           | 8313.9(13)                                                                                                   | 6019.7(9)                                                                                                     | 6336.6(11)                                                                                      | 7041.3(14)                                                                                                   |
| Z                          | 4                                                                                                            | 4                                                                                                             | 4                                                                                               | 4                                                                                                            |
| Dcalc (Mg/m <sup>3</sup> ) | 1.445                                                                                                        | 1.555                                                                                                         | 1.434                                                                                           | 1.575                                                                                                        |
| abs coeff/mm <sup>-1</sup> | 2.821                                                                                                        | 2.578                                                                                                         | 2.951                                                                                           | 3.405                                                                                                        |
| F(000)                     | 3496                                                                                                         | 2824                                                                                                          | 2728                                                                                            | 3224                                                                                                         |
| index ranges               | 0<=h<=24<br>0<=k<=22<br>0<=l<=25                                                                             | -13<=h<=11<br>-30<=k<=30<br>-18<=l<=23                                                                        | -8<=h<=14<br>-30<=k<=32<br>-23<=l<=23                                                           | -27<=h<=27<br>-14<=k<=6<br>-28<=l<=32                                                                        |
| no. of reflns              | 7530                                                                                                         | 29270                                                                                                         | 29883                                                                                           | 33012                                                                                                        |
| no. of indepreflns         | 7530                                                                                                         | 10600                                                                                                         | 11122                                                                                           | 12374                                                                                                        |
| Goodness of fit            | 1.085                                                                                                        | 0.905                                                                                                         | 1.014                                                                                           | 0.795                                                                                                        |
| R                          | 0.0861                                                                                                       | 0.0625                                                                                                        | 0.0838                                                                                          | 0.0943                                                                                                       |
| Rw                         | 0.1857                                                                                                       | 0.1141                                                                                                        | 0.2062                                                                                          | 0.2635                                                                                                       |



Table S3 Selected bond lengths (Å) and angles (°) for **1**.

| Complex <b>1</b>  |            |                   |            |
|-------------------|------------|-------------------|------------|
| Se(1)-Fe(2)       | 2.4131(10) | Fe(1)-P(1)        | 2.2298(17) |
| Se(1)-Fe(1)       | 2.4146(10) | Fe(1)-Fe(2)       | 2.6781(11) |
| Se(2)-Fe(2)       | 2.3864(9)  | Fe(2)-C(2)        | 1.756(7)   |
| Se(2)-Fe(1)       | 2.3915(9)  | Fe(2)-P(4)        | 2.1922(17) |
| Fe(1)-C(1)        | 1.756(7)   | Fe(2)-P(3)        | 2.2264(17) |
| Fe(1)-P(2)        | 2.2157(17) |                   |            |
| C(55)-Se(1)-Fe(2) | 108.09(18) | P(1)-Fe(1)-Fe(2)  | 151.39(6)  |
| C(55)-Se(1)-Fe(1) | 114.6(2)   | Se(2)-Fe(1)-Fe(2) | 55.82(3)   |
| Fe(2)-Se(1)-Fe(1) | 67.38(3)   | Se(1)-Fe(1)-Fe(2) | 56.28(3)   |
| C(62)-Se(2)-Fe(2) | 112.7(2)   | C(2)-Fe(2)-P(4)   | 89.9(2)    |
| C(62)-Se(2)-Fe(1) | 116.3(2)   | C(2)-Fe(2)-P(3)   | 88.2(2)    |
| Fe(2)-Se(2)-Fe(1) | 68.18(3)   | P(4)-Fe(2)-P(3)   | 86.21(6)   |
| C(1)-Fe(1)-P(2)   | 91.7(2)    | C(2)-Fe(2)-Se(2)  | 90.4(2)    |
| C(1)-Fe(1)-P(1)   | 102.5(2)   | P(4)-Fe(2)-Se(2)  | 102.52(5)  |
| P(2)-Fe(1)-P(1)   | 86.02(6)   | P(3)-Fe(2)-Se(2)  | 171.15(6)  |
| C(1)-Fe(1)-Se(2)  | 94.82(19)  | C(2)-Fe(2)-Se(1)  | 163.8(2)   |
| P(2)-Fe(1)-Se(2)  | 172.69(6)  | P(4)-Fe(2)-Se(1)  | 104.64(5)  |
| P(1)-Fe(1)-Se(2)  | 95.82(5)   | P(3)-Fe(2)-Se(1)  | 99.80(5)   |
| C(1)-Fe(1)-Se(1)  | 137.2(2)   | Se(2)-Fe(2)-Se(1) | 79.59(3)   |
| P(2)-Fe(1)-Se(1)  | 93.49(5)   | C(2)-Fe(2)-Fe(1)  | 107.5(2)   |
| P(1)-Fe(1)-Se(1)  | 120.24(5)  | P(4)-Fe(2)-Fe(1)  | 151.31(6)  |
| Se(2)-Fe(1)-Se(1) | 79.46(3)   | P(3)-Fe(2)-Fe(1)  | 116.28(5)  |
| C(1)-Fe(1)-Fe(2)  | 85.26(19)  | Se(2)-Fe(2)-Fe(1) | 56.00(3)   |
| P(2)-Fe(1)-Fe(2)  | 121.62(5)  | Se(1)-Fe(2)-Fe(1) | 56.34(3)   |

Table S4 Selected bond lengths (Å) and angles (°) for **2**.

| Complex <b>2</b>  |            |                   |            |
|-------------------|------------|-------------------|------------|
| Se(1)-Fe(2)       | 2.4099(11) | Fe(1)-C(1)        | 1.741(8)   |
| Se(1)-Fe(1)       | 2.4215(11) | Fe(1)-P(1)        | 2.2116(17) |
| Se(2)-Fe(1)       | 2.4007(10) | Fe(1)-P(2)        | 2.225(2)   |
| Se(2)-Fe(2)       | 2.4360(10) | Fe(2)-C(2)        | 1.736(7)   |
| Se(3)-Fe(2)       | 2.4605(11) | Fe(2)-P(3)        | 2.215(2)   |
| Se(3)-Fe(1)       | 2.4883(11) | Fe(2)-P(4)        | 2.2183(18) |
| C(3)-Se(1)-Fe(2)  | 114.1(2)   | P(3)-Fe(2)-Se(1)  | 166.92(7)  |
| C(3)-Se(1)-Fe(1)  | 107.63(19) | P(4)-Fe(2)-Se(1)  | 90.25(6)   |
| Fe(2)-Se(1)-Fe(1) | 85.59(3)   | C(2)-Fe(2)-Se(2)  | 98.7(2)    |
| C(10)-Se(2)-Fe(1) | 109.01(18) | P(3)-Fe(2)-Se(2)  | 93.35(5)   |
| C(10)-Se(2)-Fe(2) | 115.0(2)   | P(4)-Fe(2)-Se(2)  | 160.30(6)  |
| Fe(1)-Se(2)-Fe(2) | 85.47(3)   | Se(1)-Fe(2)-Se(2) | 86.91(3)   |
| Fe(2)-Se(3)-Fe(1) | 83.10(3)   | C(2)-Fe(2)-Se(3)  | 169.1(2)   |
| C(1)-Fe(1)-P(1)   | 91.1(2)    | P(3)-Fe(2)-Se(3)  | 90.51(6)   |
| C(1)-Fe(1)-P(2)   | 90.1(2)    | P(4)-Fe(2)-Se(3)  | 87.49(6)   |
| P(1)-Fe(1)-P(2)   | 84.28(7)   | Se(1)-Fe(2)-Se(3) | 77.06(3)   |
| C(1)-Fe(1)-Se(2)  | 95.4(2)    | Se(2)-Fe(2)-Se(3) | 72.87(3)   |
| P(1)-Fe(1)-Se(2)  | 173.54(7)  | C(19)-P(1)-Fe(1)  | 115.3(2)   |
| P(2)-Fe(1)-Se(2)  | 95.32(6)   | P(2)-Fe(1)-Se(3)  | 101.38(6)  |
| C(1)-Fe(1)-Se(1)  | 92.8(2)    | Se(2)-Fe(1)-Se(3) | 72.98(3)   |
| P(1)-Fe(1)-Se(1)  | 92.61(6)   | Se(1)-Fe(1)-Se(3) | 76.32(3)   |
| P(2)-Fe(1)-Se(1)  | 175.75(7)  | C(2)-Fe(2)-P(3)   | 97.0(2)    |
| Se(2)-Fe(1)-Se(1) | 87.44(4)   | C(2)-Fe(2)-P(4)   | 101.0(2)   |
| C(1)-Fe(1)-Se(3)  | 164.2(2)   | P(3)-Fe(2)-P(4)   | 85.10(7)   |
| P(1)-Fe(1)-Se(3)  | 100.76(6)  | C(2)-Fe(2)-Se(1)  | 95.9(2)    |

Table S5 Selected bond lengths (Å) and angles (°) for [3]Cl.

| Complex [3]Cl      |            |                    |            |
|--------------------|------------|--------------------|------------|
| Fe(1)-C(1)         | 1.735(6)   | Fe(2)-C(2)         | 1.743(8)   |
| Fe(1)-P(1)         | 2.2376(17) | Fe(2)-P(4)         | 2.2282(16) |
| Fe(1)-P(2)         | 2.2450(17) | Fe(2)-P(3)         | 2.2300(17) |
| Fe(1)-Cl(17)       | 2.4092(13) | Fe(2)-Cl(17)       | 2.3670(16) |
| Fe(1)-Se(2)        | 2.4176(10) | Fe(2)-Se(2)        | 2.4363(9)  |
| Fe(1)-Se(1)        | 2.4560(10) | Fe(2)-Se(1)        | 2.4380(10) |
| C(1)-Fe(1)-P(1)    | 90.12(19)  | P(4)-Fe(2)-Se(1)   | 92.86(5)   |
| C(1)-Fe(1)-P(2)    | 87.9(2)    | P(3)-Fe(2)-Se(1)   | 172.48(6)  |
| P(1)-Fe(1)-P(2)    | 83.79(6)   | Cl(17)-Fe(2)-Se(1) | 81.88(4)   |
| C(1)-Fe(1)-Cl(17)  | 166.4(2)   | Se(2)-Fe(2)-Se(1)  | 87.83(3)   |
| P(1)-Fe(1)-Cl(17)  | 98.29(5)   | C(55)-Se(1)-Fe(2)  | 108.5(2)   |
| P(2)-Fe(1)-Cl(17)  | 103.58(6)  | C(55)-Se(1)-Fe(1)  | 107.44(19) |
| C(1)-Fe(1)-Se(2)   | 91.91(19)  | Fe(2)-Se(1)-Fe(1)  | 80.10(3)   |
| P(1)-Fe(1)-Se(2)   | 93.42(5)   | C(62)-Se(2)-Fe(1)  | 109.8(2)   |
| P(2)-Fe(1)-Se(2)   | 177.20(6)  | C(62)-Se(2)-Fe(2)  | 118.2(2)   |
| Cl(17)-Fe(1)-Se(2) | 76.96(4)   | Fe(1)-Se(2)-Fe(2)  | 80.90(3)   |
| C(1)-Fe(1)-Se(1)   | 91.19(19)  | C(2)-Fe(2)-Cl(17)  | 173.4(2)   |
| P(1)-Fe(1)-Se(1)   | 178.14(6)  | P(4)-Fe(2)-Cl(17)  | 91.29(6)   |
| P(2)-Fe(1)-Se(1)   | 94.95(5)   | P(3)-Fe(2)-Cl(17)  | 90.65(6)   |
| Cl(17)-Fe(1)-Se(1) | 80.66(4)   | C(2)-Fe(2)-Se(2)   | 98.41(19)  |
| Se(2)-Fe(1)-Se(1)  | 87.84(4)   | P(4)-Fe(2)-Se(2)   | 168.45(7)  |
| C(2)-Fe(2)-P(4)    | 93.1(2)    | P(3)-Fe(2)-Se(2)   | 91.41(5)   |
| C(2)-Fe(2)-P(3)    | 94.6(2)    | Cl(17)-Fe(2)-Se(2) | 77.39(4)   |
| P(4)-Fe(2)-P(3)    | 86.39(6)   | C(2)-Fe(2)-Se(1)   | 92.9(2)    |

Table S6 Selected bond lengths (Å) and angles (°) for [4]Br.

| Complex [4]Br     |            |                   |            |
|-------------------|------------|-------------------|------------|
| Br(1)-Fe(1)       | 2.531(2)   | Fe(1)-P(1)        | 2.281(3)   |
| Br(1)-Fe(2)       | 2.570(2)   | Fe(2)-C(2)        | 1.77(2)    |
| Se(1)-Fe(1)       | 2.4565(16) | Fe(2)-P(2)        | 2.273(3)   |
| Se(1)-Fe(2)       | 2.4572(16) | Fe(1)-C(1)        | 1.793(18)  |
| Fe(1)-Br(1)-Fe(2) | 78.47(7)   | P(2)-Fe(2)-Br(1)  | 101.50(10) |
| C(29)-Se(1)-Fe(1) | 117.7(3)   | Se(1)-Fe(2)-Br(1) | 78.10(6)   |
| C(29)-Se(1)-Fe(2) | 109.1(3)   | P(1)-Fe(1)-Br(1)  | 92.63(9)   |
| Fe(1)-Se(1)-Fe(2) | 82.07(6)   | Se(1)-Fe(1)-Br(1) | 78.87(6)   |
| C(1)-Fe(1)-P(1)   | 96.8(3)    | C(2)-Fe(2)-P(2)   | 91.6(3)    |
| C(1)-Fe(1)-Se(1)  | 92.1(3)    | C(2)-Fe(2)-Se(1)  | 89.4(3)    |
| P(1)-Fe(1)-Se(1)  | 92.69(7)   | C(2)-Fe(2)-Br(1)  | 162.4(4)   |
| C(1)-Fe(1)-Br(1)  | 167.3(5)   |                   |            |

Table S7 Selected bond lengths (Å) and angles (°) for [5]I<sub>3</sub>.

| Complex [5]I <sub>3</sub> |            |                  |            |
|---------------------------|------------|------------------|------------|
| Se(1)-Fe(2)               | 2.4933(18) | Fe(1)-I(1)       | 2.772(2)   |
| Se(1)-Fe(1)               | 2.4937(17) | Fe(2)-C(2)       | 1.722(16)  |
| Fe(1)-C(1)                | 1.780(17)  | Fe(2)-P(2)       | 2.285(3)   |
| Fe(1)-P(1)                | 2.312(3)   | Fe(2)-I(1)       | 2.779(2)   |
| C(29)-Se(1)-Fe(2)         | 108.8(3)   | C(2)-Fe(2)-Se(1) | 92.2(3)    |
| C(29)-Se(1)-Fe(1)         | 114.3(3)   | P(2)-Fe(2)-Se(1) | 93.92(8)   |
| Fe(2)-Se(1)-Fe(1)         | 84.72(6)   | C(2)-Fe(2)-I(1)  | 166.5(4)   |
| C(1)-Fe(1)-P(1)           | 95.5(4)    | P(2)-Fe(2)-I(1)  | 100.72(10) |
| C(1)-Fe(1)-Se(1)          | 94.2(4)    | Se(1)-Fe(2)-I(1) | 78.18(6)   |
| P(1)-Fe(1)-Se(1)          | 93.35(7)   | Fe(1)-I(1)-Fe(2) | 74.51(6)   |
| C(1)-Fe(1)-I(1)           | 169.4(5)   | Se(1)-Fe(1)-I(1) | 78.30(6)   |
| P(1)-Fe(1)-I(1)           | 92.33(9)   | C(2)-Fe(2)-P(2)  | 89.2(3)    |

Table S8 Selected bond lengths (Å) and angles (°) for [6]Cl.

| Complex [6]Cl     |            |                   |            |
|-------------------|------------|-------------------|------------|
| Fe(1)-C(60)       | 1.736(9)   | Fe(2)-C(61)       | 1.719(9)   |
| Fe(1)-P(1)        | 2.204(2)   | Fe(2)-P(4)        | 2.202(2)   |
| Fe(1)-P(2)        | 2.235(2)   | Fe(2)-P(3)        | 2.218(2)   |
| Fe(1)-Se(2)       | 2.3874(13) | Fe(2)-Se(2)       | 2.3992(13) |
| Fe(1)-Se(1)       | 2.4344(12) | Fe(2)-Se(1)       | 2.4440(13) |
| Fe(1)-Se(3)       | 2.4567(14) | Fe(2)-Se(3)       | 2.4557(12) |
| C(60)-Fe(1)-P(1)  | 92.3(3)    | P(4)-Fe(2)-Se(3)  | 109.16(7)  |
| C(60)-Fe(1)-P(2)  | 92.8(3)    | P(3)-Fe(2)-Se(3)  | 94.91(7)   |
| P(1)-Fe(1)-P(2)   | 86.28(8)   | Se(2)-Fe(2)-Se(3) | 57.23(3)   |
| C(60)-Fe(1)-Se(2) | 105.6(3)   | Se(1)-Fe(2)-Se(3) | 82.75(4)   |
| P(1)-Fe(1)-Se(2)  | 162.06(8)  | C(1)-Se(1)-Fe(1)  | 110.7(3)   |
| P(2)-Fe(1)-Se(2)  | 91.85(7)   | C(1)-Se(1)-Fe(2)  | 102.2(2)   |
| C(60)-Fe(1)-Se(1) | 91.7(3)    | Fe(1)-Se(1)-Fe(2) | 87.53(4)   |
| P(1)-Fe(1)-Se(1)  | 94.39(7)   | Se(2)-Se(3)-Fe(2) | 60.16(4)   |
| P(2)-Fe(1)-Se(1)  | 175.50(8)  | Se(2)-Se(3)-Fe(1) | 59.82(4)   |
| Se(2)-Fe(1)-Se(1) | 86.14(4)   | Fe(2)-Se(3)-Fe(1) | 86.77(4)   |
| C(60)-Fe(1)-Se(3) | 162.3(3)   | Se(3)-Se(2)-Fe(1) | 62.82(4)   |
| P(1)-Fe(1)-Se(3)  | 104.86(7)  | Se(3)-Se(2)-Fe(2) | 62.61(4)   |
| P(2)-Fe(1)-Se(3)  | 92.60(7)   | Fe(1)-Se(2)-Fe(2) | 89.66(4)   |
| Se(2)-Fe(1)-Se(3) | 57.36(4)   | P(3)-Fe(2)-Se(2)  | 93.30(7)   |
| Se(1)-Fe(1)-Se(3) | 82.92(4)   | C(61)-Fe(2)-Se(1) | 93.9(3)    |
| C(61)-Fe(2)-P(4)  | 90.5(3)    | P(4)-Fe(2)-Se(1)  | 94.85(7)   |
| C(61)-Fe(2)-P(3)  | 88.4(3)    | P(3)-Fe(2)-Se(1)  | 177.64(7)  |
| P(4)-Fe(2)-P(3)   | 85.64(9)   | Se(2)-Fe(2)-Se(1) | 85.67(4)   |
| C(61)-Fe(2)-Se(2) | 103.2(3)   | C(61)-Fe(2)-Se(3) | 160.2(3)   |
| P(4)-Fe(2)-Se(2)  | 166.26(7)  |                   |            |

Table S9 Selected bond lengths (Å) and angles (°) for [6]Br.

| Complex [6]Br     |            |                   |            |
|-------------------|------------|-------------------|------------|
| Fe(1)-C(1)        | 1.732(13)  | Fe(2)-C(2)        | 1.697(13)  |
| Fe(1)-P(1)        | 2.188(3)   | Fe(2)-P(3)        | 2.194(3)   |
| Fe(1)-P(2)        | 2.205(3)   | Fe(2)-P(4)        | 2.217(3)   |
| Fe(1)-Se(2)       | 2.3883(18) | Fe(2)-Se(2)       | 2.3729(18) |
| Fe(1)-Se(1)       | 2.4212(18) | Fe(2)-Se(1)       | 2.4210(18) |
| Fe(1)-Se(3)       | 2.4399(17) | Fe(2)-Se(3)       | 2.4487(18) |
| C(1)-Fe(1)-P(1)   | 89.9(4)    | P(4)-Fe(2)-Se(3)  | 92.61(10)  |
| C(1)-Fe(1)-P(2)   | 87.6(4)    | Se(2)-Fe(2)-Se(3) | 57.44(5)   |
| P(1)-Fe(1)-P(2)   | 86.02(12)  | Se(1)-Fe(2)-Se(3) | 81.92(6)   |
| C(1)-Fe(1)-Se(2)  | 102.9(4)   | C(55)-Se(1)-Fe(2) | 111.6(4)   |
| P(1)-Fe(1)-Se(2)  | 167.10(11) | C(55)-Se(1)-Fe(1) | 101.6(4)   |
| P(2)-Fe(1)-Se(2)  | 93.16(10)  | Fe(2)-Se(1)-Fe(1) | 87.88(6)   |
| C(1)-Fe(1)-Se(1)  | 95.1(4)    | Se(2)-Se(3)-Fe(1) | 60.20(5)   |
| P(1)-Fe(1)-Se(1)  | 94.27(10)  | Se(2)-Se(3)-Fe(2) | 59.64(5)   |
| P(2)-Fe(1)-Se(1)  | 177.23(11) | Fe(1)-Se(3)-Fe(2) | 86.83(6)   |
| Se(2)-Fe(1)-Se(1) | 85.94(6)   | Se(3)-Se(2)-Fe(2) | 62.93(5)   |
| C(1)-Fe(1)-Se(3)  | 160.1(4)   | Se(3)-Se(2)-Fe(1) | 62.44(5)   |
| P(1)-Fe(1)-Se(3)  | 109.85(10) | Fe(2)-Se(2)-Fe(1) | 89.77(6)   |
| P(2)-Fe(1)-Se(3)  | 95.21(9)   | P(4)-Fe(2)-Se(2)  | 91.51(10)  |
| Se(2)-Fe(1)-Se(3) | 57.36(5)   | C(2)-Fe(2)-Se(1)  | 91.3(4)    |
| Se(1)-Fe(1)-Se(3) | 82.10(6)   | P(3)-Fe(2)-Se(1)  | 94.96(10)  |
| C(2)-Fe(2)-P(3)   | 92.7(4)    | P(4)-Fe(2)-Se(1)  | 174.47(11) |
| C(2)-Fe(2)-P(4)   | 94.1(4)    | Se(2)-Fe(2)-Se(1) | 86.28(6)   |
| P(3)-Fe(2)-P(4)   | 85.77(12)  | C(2)-Fe(2)-Se(3)  | 159.8(4)   |
| C(2)-Fe(2)-Se(2)  | 103.4(4)   | P(3)-Fe(2)-Se(3)  | 106.76(10) |
| P(3)-Fe(2)-Se(2)  | 163.89(11) |                   |            |

Table S10 Selected bond lengths (Å) and angles (°) for [6]I<sub>3</sub>.

| Complex [6]I <sub>3</sub> |            |                   |            |
|---------------------------|------------|-------------------|------------|
| Se(1)-Fe(1)               | 2.394(2)   | Fe(1)-C(1)        | 1.755(18)  |
| Se(1)-Fe(2)               | 2.403(2)   | Fe(1)-P(1)        | 2.251(4)   |
| Se(2)-Se(3)               | 2.332(2)   | Fe(1)-P(2)        | 2.273(4)   |
| Se(2)-Fe(1)               | 2.403(2)   | Fe(2)-C(2)        | 1.679(13)  |
| Se(2)-Fe(2)               | 2.429(2)   | Fe(2)-P(4)        | 2.236(4)   |
| Se(3)-Fe(2)               | 2.369(2)   | Fe(2)-P(3)        | 2.268(4)   |
| Se(3)-Fe(1)               | 2.381(2)   |                   |            |
| C(55)-Se(1)-Fe(1)         | 110.4(4)   | P(4)-Fe(2)-Se(2)  | 108.57(11) |
| C(55)-Se(1)-Fe(2)         | 103.8(3)   | P(3)-Fe(2)-Se(2)  | 94.15(11)  |
| Fe(1)-Se(1)-Fe(2)         | 80.60(7)   | Se(3)-Fe(2)-Se(2) | 58.16(7)   |
| Se(3)-Se(2)-Fe(1)         | 60.36(7)   | Se(1)-Fe(2)-Se(2) | 86.59(7)   |
| Se(3)-Se(2)-Fe(2)         | 59.63(6)   | C(1)-Fe(1)-Se(2)  | 163.2(5)   |
| Fe(1)-Se(2)-Fe(2)         | 79.90(7)   | P(1)-Fe(1)-Se(2)  | 95.76(12)  |
| Se(2)-Se(3)-Fe(2)         | 62.22(6)   | P(2)-Fe(1)-Se(2)  | 95.51(13)  |
| Se(2)-Se(3)-Fe(1)         | 61.28(7)   | Se(3)-Fe(1)-Se(2) | 58.36(7)   |
| Fe(2)-Se(3)-Fe(1)         | 81.56(8)   | Se(1)-Fe(1)-Se(2) | 87.37(8)   |
| C(1)-Fe(1)-P(1)           | 101.1(5)   | C(2)-Fe(2)-P(4)   | 91.7(4)    |
| C(1)-Fe(1)-P(2)           | 86.5(5)    | C(2)-Fe(2)-P(3)   | 90.7(4)    |
| P(1)-Fe(1)-P(2)           | 83.97(15)  | P(4)-Fe(2)-P(3)   | 84.85(14)  |
| C(1)-Fe(1)-Se(3)          | 105.0(5)   | C(2)-Fe(2)-Se(3)  | 101.7(4)   |
| P(1)-Fe(1)-Se(3)          | 152.84(13) | P(4)-Fe(2)-Se(3)  | 166.34(12) |
| P(2)-Fe(1)-Se(3)          | 90.10(12)  | P(3)-Fe(2)-Se(3)  | 92.57(12)  |
| C(1)-Fe(1)-Se(1)          | 91.9(5)    | C(2)-Fe(2)-Se(1)  | 91.6(4)    |
| P(1)-Fe(1)-Se(1)          | 91.51(12)  | P(4)-Fe(2)-Se(1)  | 86.73(11)  |
| P(2)-Fe(1)-Se(1)          | 174.86(13) | P(3)-Fe(2)-Se(1)  | 171.33(13) |
| Se(3)-Fe(1)-Se(1)         | 95.03(8)   |                   |            |
